# Supplementary material for: A Screening Test for HLA-B∗15:02 in a Large United States Patient Cohort Identifies Broader Risk of Carbamazepine-Induced Adverse Events
Source: PubMed Central journal article supplement (PMC6443844; doi:10.3389/fphar.2019.00149), 2019-03-26

**Supplementary Figure S1.** Representative genotyping results for rs144012689 RT-PCR genotyping assay

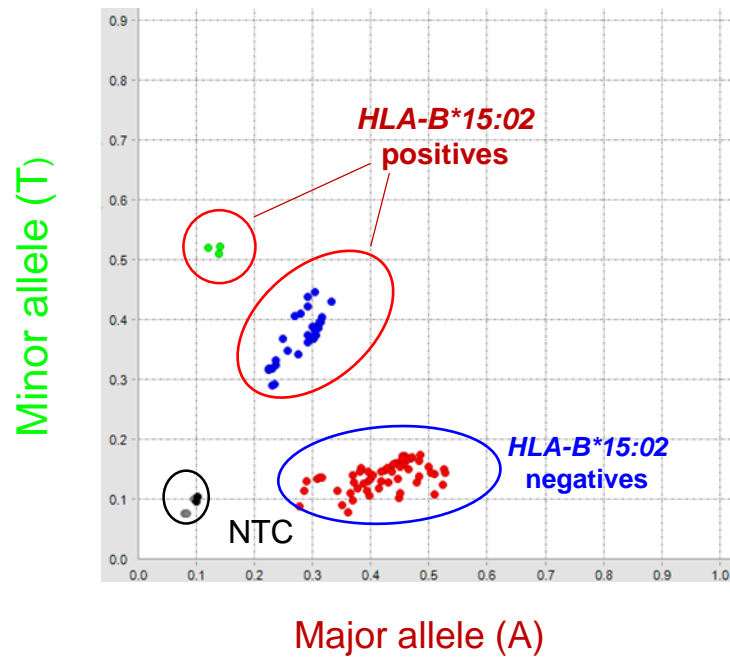

Supplement: Image_1.pdf [file Image_1.pdf]
