# Supplementary material for: A Screening Test for HLA-B∗15:02 in a Large United States Patient Cohort Identifies Broader Risk of Carbamazepine-Induced Adverse Events
Source: PubMed Central journal article supplement (PMC6443844; doi:10.3389/fphar.2019.00149), 2019-03-26
Supplement: Table_1.pdf [file Table_1.pdf]

| Individual (1000 Genomes Project Phase 3 Naming) | rs144012689 Genotype (minus strand;1000 Genomes) | Population                                          | HLA-B Allele 1 (from NCBI dbMHC portal)                                | HLA-B Allele 2 (from NCBI dbMHC portal)                   |
|--------------------------------------------------|--------------------------------------------------|-----------------------------------------------------|------------------------------------------------------------------------|-----------------------------------------------------------|
| NA19625 (F)                                      | A/A                                              | 1000 Genomes - African Ancestry from Southwest, USA | 07:02:01/07:02:06/07:02:09/07:44/07:49N/07:58/07:59/07:61              | 44:03:02                                                  |
| NA19700 (M)                                      | A/A                                              |                                                     | 15:10                                                                  | 42:01:00                                                  |
| NA19701 (F)                                      | A/A                                              |                                                     | 15:37                                                                  | 40:02:01/40:56/40:97                                      |
| NA19703 (M)                                      | A/A                                              |                                                     | 44:02:01:01/44:02:01:02S/44:19N/44:27/44:66                            | 58:01:01/58:11                                            |
| NA19704 (F)                                      | A/A                                              |                                                     | 15:10                                                                  | 51:01:01/51:01:05/51:01:07/51:11N/51:30/51:32/51:48/51:51 |
| NA19707 (F)                                      | A/A                                              |                                                     | 07:02:01/07:02:06/07:02:09/07:44/07:49N/07:58/07:59/07:61              | 40:01:01/40:01:02/40:55                                   |
| NA19711 (M)                                      | A/A                                              |                                                     | 35:01:01/35:01:03/35:40N/35:42/35:57/35:94                             | 53:01:01                                                  |
| NA19712 (F)                                      | A/A                                              |                                                     | 15:03:01/15:103                                                        | 45:01/45:07                                               |
| NA19713 (F)                                      | A/A                                              |                                                     | 13:02:01/13:02:05                                                      | 45:01/45:07                                               |
| NA19818 (M)                                      | A/A                                              |                                                     | 39:10:00                                                               | 42:01:00                                                  |
| NA19819 (F)                                      | A/A                                              |                                                     | 40:01:01/40:01:02/40:55                                                | 58:02:00                                                  |
| NA19834 (M)                                      | A/A                                              |                                                     | 35:01:01/35:01:03/35:40N/35:42/35:57/35:94                             | 39:10:00                                                  |
| NA19835 (F)                                      | A/A                                              |                                                     | 50:01:00                                                               | 53:01:01                                                  |
| NA19900 (M)                                      | A/A                                              |                                                     | 42:01:00                                                               | 44:03:01/44:03:03/44:03:04                                |
| NA19901 (F)                                      | A/A                                              |                                                     | 39:06:02                                                               | 58:02:00                                                  |
| NA19904 (M)                                      | A/A                                              |                                                     | 35:03:01/35:70                                                         | 44:02:01:01/44:02:01:02S/44:19N/44:27/44:66               |
| NA19908 (M)                                      | A/A                                              |                                                     | 50:01:00                                                               | 58:01:01/58:11                                            |
| NA19909 (F)                                      | A/A                                              |                                                     | 42:01:00                                                               | 42:01:00                                                  |
| NA19914 (F)                                      | A/A                                              |                                                     | 35:01:01/35:01:03/35:40N/35:42/35:57/35:94                             | 44:03:01/44:03:03/44:03:04                                |
| NA19916 (M)                                      | A/A                                              |                                                     | 15:03:01/15:103                                                        | 53:01:01                                                  |
| NA19917 (F)                                      | A/A                                              |                                                     | 15:03:01/15:103                                                        | 41:02:01                                                  |
| NA19920 (M)                                      | A/A                                              |                                                     | 08:01:01/08:19N                                                        | 57:03:01                                                  |
| NA19921 (F)                                      | A/A                                              |                                                     | 15:01:01:01/15:01:01:02N/15:01:06/15:01:07/15:102/15:104/15:140/15:146 | 48:01:01/48:09                                            |
| NA19982 (M)                                      | A/A                                              |                                                     | 07:02:01/07:02:06/07:02:09/07:44/07:49N/07:58/07:59/07:61              | 27:05:02/27:05:04/27:13                                   |
| NA20126 (M)                                      | A/A                                              |                                                     | 27:05:02/27:05:04/27:13                                                | 57:03:01                                                  |
| NA20127 (F)                                      | A/A                                              |                                                     | 13:02:01/13:02:05                                                      | 35:01:01/35:01:03/35:40N/35:42/35:57/35:94                |
| NA20276 (F)                                      | A/A                                              |                                                     | 44:03:01/44:03:03/44:03:04                                             | 49:01:01                                                  |
| NA20278 (M)                                      | A/A                                              |                                                     | 44:03:01/44:03:03/44:03:04                                             | 49:01:01                                                  |
| NA20281 (M)                                      | A/A                                              |                                                     | 15:17:01:01/15:17:01:02                                                | 53:01:01                                                  |
| NA20282 (F)                                      | A/A                                              |                                                     | 53:01:01                                                               | 81:01/81:02/81:03                                         |
| NA20287 (F)                                      | A/A                                              |                                                     | 15:03:01/15:103                                                        | 55:01:01/55:01:03                                         |
| NA20289 (F)                                      | A/A                                              |                                                     | 42:01:00                                                               | 53:01:01                                                  |
| NA20291 (M)                                      | A/A                                              |                                                     | 14:01                                                                  | 58:01:01/58:11                                            |
| NA20294 (F)                                      | A/A                                              |                                                     | 13:02:01/13:02:05                                                      | 45:01/45:07                                               |
| NA20296 (F)                                      | A/A                                              |                                                     | 44:03:01/44:03:03/44:03:04                                             | 58:01:01/58:11                                            |
| NA20299 (F)                                      | A/A                                              |                                                     | 35:01:01/35:01:03/35:40N/35:42/35:57/35:94                             | 44:05:00                                                  |
| NA20314 (F)                                      | A/A                                              |                                                     | 07:02:01/07:02:06/07:02:09/07:44/07:49N/07:58/07:59/07:61              | 51:01:01/51:01:05/51:01:07/51:11N/51:30/51:32/51:48/51:51 |
| NA20317 (F)                                      | A/A                                              |                                                     | 58:01:01/58:11                                                         | 58:01:01/58:11                                            |
| NA20332 (F)                                      | A/A                                              |                                                     | 07:02:01/07:02:06/07:02:09/07:44/07:49N/07:58/07:59/07:61              | 53:01:01                                                  |
| NA20334 (F)                                      | A/A                                              |                                                     | 07:02:01/07:02:06/07:02:09/07:44/07:49N/07:58/07:59/07:61              | 53:01:01                                                  |
| NA20340 (M)                                      | A/A                                              |                                                     | 15:16                                                                  | 44:03:01/44:03:03/44:03:04                                |
| NA20342 (M)                                      | A/A                                              |                                                     | 53:01:01                                                               | 53:01:01                                                  |
| NA20346 (M)                                      | A/A                                              |                                                     | 15:10                                                                  | 53:01:01                                                  |
| NA20348 (M)                                      | A/A                                              |                                                     | 18:01:01/18:01:03/18:17N                                               | 42:01:00                                                  |
| NA20356 (M)                                      | A/A                                              |                                                     | 07:02:01/07:02:06/07:02:09/07:44/07:49N/07:58/07:59/07:61              | 78:01:00                                                  |
| NA20357 (F)                                      | A/A                                              |                                                     | 07:02:01/07:02:06/07:02:09/07:44/07:49N/07:58/07:59/07:61              | 81:01/81:02/81:03                                         |
| NA20359 (F)                                      | A/A                                              |                                                     | 53:01:01                                                               | 53:01:01                                                  |
| NA18501 (M)                                      | A/A                                              |                                                     | 14:01                                                                  | 78:01:00                                                  |
| NA18502 (F)                                      | A/A                                              | 14:03                                               | 58:01:00                                                               |                                                           |
| NA18504 (M)                                      | A/A                                              | 15:03                                               | 39:10:00                                                               |                                                           |
| NA18505 (F)                                      | A/A                                              | 15:03                                               | 53:01:00                                                               |                                                           |
| NA18507 (M)                                      | A/A                                              | 15:03                                               | 42:01:00                                                               |                                                           |
| NA18508 (F)                                      | A/A                                              | 42:01:00                                            | 53:01:00                                                               |                                                           |
| NA18516 (M)                                      | A/A                                              | 15:10                                               | 53:01:00                                                               |                                                           |
| NA18517 (F)                                      | A/A                                              | 49:01:00                                            | 51:01:00                                                               |                                                           |
| NA18522 (M)                                      | A/A                                              | 15:03                                               | 49:01:00                                                               |                                                           |

| Individual (1000 Genomes Project Phase 3 Naming) | rs144012689 Genotype (minus strand;1000 Genomes) | Population                                                | HLA-B Allele 1 (from NCBI dbMHC portal)                   | HLA-B Allele 2 (from NCBI dbMHC portal) |
|--------------------------------------------------|--------------------------------------------------|-----------------------------------------------------------|-----------------------------------------------------------|-----------------------------------------|
| NA18523 (F)                                      | A/A                                              | 1000 Genomes - Yoruba from Ibadan, Nigeria                | 7:02                                                      | 35:01:00                                |
| NA18853 (M)                                      | A/A                                              |                                                           | 44:03:01/44:03:03/44:03:04                                | 52:01:00                                |
| NA18856 (M)                                      | A/A                                              |                                                           | 35:01:00                                                  | 49:01:00                                |
| NA18858 (F)                                      | A/A                                              |                                                           | 18:01                                                     | 49:01:00                                |
| NA18861 (F)                                      | A/A                                              |                                                           | 13:02:01/13:02:05                                         | 57:03:00                                |
| NA18870 (F)                                      | A/A                                              |                                                           | 15:03                                                     | 57:03:00                                |
| NA18871 (M)                                      | A/A                                              |                                                           | 42:01:00                                                  | 52:01:00                                |
| NA18912 (F)                                      | A/A                                              |                                                           | 53:01:00                                                  | 53:01:00                                |
| NA19092 (M)                                      | A/A                                              |                                                           | 42:01:00                                                  | 81:01:00                                |
| NA19093 (F)                                      | A/A                                              |                                                           | 35:01:00                                                  | 53:01:00                                |
| NA19098 (M)                                      | A/A                                              |                                                           | 51:01:00                                                  | 53:01:00                                |
| NA19099 (F)                                      | A/A                                              |                                                           | 7:02                                                      | 7:02                                    |
| NA19102 (F)                                      | A/A                                              |                                                           | 18:01                                                     | 42:01:00                                |
| NA19119 (M)                                      | A/A                                              |                                                           | 35:01:01/35:01:03/35:40N/35:42/35:57/35:94                | 49:01:01                                |
| NA19129 (F)                                      | A/A                                              |                                                           | 7:02                                                      | 58:01:00                                |
| NA19130 (M)                                      | A/A                                              |                                                           | 13:02:01/13:02:05                                         | 35:01:00                                |
| NA19131 (F)                                      | A/A                                              |                                                           | 42:01:00                                                  | 53:01:00                                |
| NA19137 (F)                                      | A/A                                              |                                                           | 7:02                                                      | 45:01:00                                |
| NA19138 (M)                                      | A/A                                              |                                                           | 7:02                                                      | 58:01:00                                |
| NA19141 (M)                                      | A/A                                              |                                                           | 35:01:00                                                  | 52:01:00                                |
| NA19143 (F)                                      | A/A                                              |                                                           | 52:01:00                                                  | 53:01:00                                |
| NA19144 (M)                                      | A/A                                              |                                                           | 53:01:00                                                  | 58:01:00                                |
| NA19152 (F)                                      | A/A                                              |                                                           | 15:10                                                     | 56:01:00                                |
| NA19153 (M)                                      | A/A                                              |                                                           | 18:01                                                     | 53:01:00                                |
| NA19159 (F)                                      | A/A                                              |                                                           | 52:01:00                                                  | 57:02:00                                |
| NA19160 (M)                                      | A/A                                              |                                                           | 15:10                                                     | 51:01:00                                |
| NA19171 (M)                                      | A/A                                              |                                                           | 52:01:00                                                  | 53:01:00                                |
| NA19172 (F)                                      | A/A                                              |                                                           | 35:01:00                                                  | 44:03:01/44:03:03/44:03:04              |
| NA19200 (M)                                      | A/A                                              |                                                           | 7:02                                                      | 52:01:00                                |
| NA19201 (F)                                      | A/A                                              |                                                           | 15:16                                                     | 18:01                                   |
| NA19204 (F)                                      | A/A                                              |                                                           | 18:01                                                     | 58:01:00                                |
| NA19206 (F)                                      | A/A                                              |                                                           | 42:01:00                                                  | 53:01:00                                |
| NA19207 (M)                                      | A/A                                              |                                                           | 8:01                                                      | 15:10                                   |
| NA19209 (F)                                      | A/A                                              |                                                           | 15:10                                                     | 52:01:00                                |
| NA19210 (M)                                      | A/A                                              |                                                           | 15:10                                                     | 58:01:01/58:11                          |
| NA19222 (F)                                      | A/A                                              |                                                           | 42:02:00                                                  | 45:01:00                                |
| NA19223 (M)                                      | A/A                                              |                                                           | 41:04:00                                                  | 42:01:00                                |
| NA19238 (F)                                      | A/A                                              |                                                           | 53:01:00                                                  | 57:03:00                                |
| NA19239 (M)                                      | A/A                                              |                                                           | 35:01:00                                                  | 52:01:00                                |
| NA19027 (M)                                      | A/A                                              |                                                           | 53:01:01                                                  | 57:03:01                                |
| NA19028 (M)                                      | A/A                                              |                                                           | 13:02:01/13:02:05                                         | 15:03:01/15:103                         |
| NA19031 (M)                                      | A/A                                              |                                                           | 42:01:00                                                  | 53:01:01                                |
| NA19035 (M)                                      | A/A                                              | 42:01:00                                                  | 44:03:01/44:03:03/44:03:04                                |                                         |
| NA19036 (F)                                      | A/A                                              | 53:01:01                                                  | 58:02:00                                                  |                                         |
| NA19038 (F)                                      | A/A                                              | 15:03:01/15:103                                           | 35:01:01/35:01:03/35:40N/35:42/35:57/35:94                |                                         |
| NA19041 (M)                                      | A/A                                              | 45:01/45:07                                               | 58:02:00                                                  |                                         |
| NA19307 (M)                                      | A/A                                              | 52:01:01/52:07                                            | 81:01/81:02/81:03                                         |                                         |
| NA19308 (M)                                      | A/A                                              | 18:03                                                     | 58:01:01/58:11                                            |                                         |
| NA19309 (M)                                      | A/A                                              | 27:03:00                                                  | 58:02:00                                                  |                                         |
| NA19310 (F)                                      | A/A                                              | 35:01:01/35:01:03/35:40N/35:42/35:57/35:94                | 53:01:01                                                  |                                         |
| NA19314 (F)                                      | A/A                                              | 18:01:01/18:01:03/18:17N                                  | 51:01:01/51:01:05/51:01:07/51:11N/51:30/51:32/51:48/51:51 |                                         |
| NA19315 (F)                                      | A/A                                              | 45:01/45:07                                               | 58:01:01/58:11                                            |                                         |
| NA19316 (F)                                      | A/A                                              | 15:03:01/15:103                                           | 58:01:01/58:11                                            |                                         |
| NA19317 (M)                                      | A/A                                              | 15:03:01/15:103                                           | 42:01:00                                                  |                                         |
| NA19318 (M)                                      | A/A                                              | 07:02:01/07:02:06/07:02:09/07:44/07:49N/07:58/07:59/07:61 | 82:02:00                                                  |                                         |
| NA19319 (M)                                      | A/A                                              | 15:03:01/15:103                                           | 53:01:01                                                  |                                         |

| Individual (1000 Genomes Project Phase 3 Naming) | rs144012689 Genotype (minus strand;1000 Genomes) | Population                                                | HLA-B Allele 1 (from NCBI dbMHC portal)                   | HLA-B Allele 2 (from NCBI dbMHC portal)                   |
|--------------------------------------------------|--------------------------------------------------|-----------------------------------------------------------|-----------------------------------------------------------|-----------------------------------------------------------|
| NA19321 (F)                                      | A/A                                              | 1000 Genomes - Luhya from Webuye, Kenya                   | 45:01/45:07                                               | 53:01:01                                                  |
| NA19324 (F)                                      | A/A                                              |                                                           | 08:01:01/08:19N                                           | 58:01:01/58:11                                            |
| NA19327 (F)                                      | A/A                                              |                                                           | 45:01/45:07                                               | 45:01/45:07                                               |
| NA19328 (F)                                      | A/A                                              |                                                           | 18:01:01/18:01:03/18:17N                                  | 53:01:01                                                  |
| NA19332 (F)                                      | A/A                                              |                                                           | 15:10                                                     | 58:02:00                                                  |
| NA19334 (M)                                      | A/A                                              |                                                           | 15:10                                                     | 45:01/45:07                                               |
| NA19346 (M)                                      | A/A                                              |                                                           | 15:03:01/15:103                                           | 18:01:01/18:01:03/18:17N                                  |
| NA19347 (M)                                      | A/A                                              |                                                           | 07:02:01/07:02:06/07:02:09/07:44/07:49N/07:58/07:59/07:61 | 58:01:01/58:11                                            |
| NA19350 (M)                                      | A/A                                              |                                                           | 18:01:01/18:01:03/18:17N                                  | 58:02:00                                                  |
| NA19360 (M)                                      | A/A                                              |                                                           | 53:01:01                                                  | 58:02:00                                                  |
| NA19372 (M)                                      | A/A                                              |                                                           | 51:01:01/51:01:05/51:01:07/51:11N/51:30/51:32/51:48/51:51 | 53:01:01                                                  |
| NA19374 (M)                                      | A/A                                              |                                                           | 35:01:01/35:01:03/35:40N/35:42/35:57/35:94                | 41:01:00                                                  |
| NA19375 (M)                                      | A/A                                              |                                                           | 15:10                                                     | 15:03:01/15:103                                           |
| NA19376 (M)                                      | A/A                                              |                                                           | 15:17:01:01/15:17:01:02                                   | 58:02:00                                                  |
| NA19377 (F)                                      | A/A                                              |                                                           | 42:01:00                                                  | 82:02:00                                                  |
| NA19379 (F)                                      | A/A                                              |                                                           | 51:01:01/51:01:05/51:01:07/51:11N/51:30/51:32/51:48/51:51 | 53:01:01                                                  |
| NA19380 (M)                                      | A/A                                              |                                                           | 45:01/45:07                                               | 51:01:01/51:01:05/51:01:07/51:11N/51:30/51:32/51:48/51:51 |
| NA19383 (M)                                      | A/A                                              |                                                           | 15:10                                                     | 53:01:01                                                  |
| NA19384 (M)                                      | A/A                                              |                                                           | 35:01:01/35:01:03/35:40N/35:42/35:57/35:94                | 45:01/45:07                                               |
| NA19385 (M)                                      | A/A                                              |                                                           | 08:01:01/08:19N                                           | 81:01/81:02/81:03                                         |
| NA19390 (F)                                      | A/A                                              |                                                           | 15:03:01/15:103                                           | 48:05:00                                                  |
| NA19391 (F)                                      | A/A                                              |                                                           | 53:01:01                                                  | 57:03:01                                                  |
| NA19393 (M)                                      | A/A                                              |                                                           | 15:17:01:01/15:17:01:02                                   | 15:03:01/15:103                                           |
| NA19394 (M)                                      | A/A                                              |                                                           | 13:02:01/13:02:05                                         | 14:02:01                                                  |
| NA19397 (M)                                      | A/A                                              |                                                           | 08:01:01/08:19N                                           | 58:02:00                                                  |
| NA19399 (F)                                      | A/A                                              |                                                           | 18:01:01/18:01:03/18:17N                                  | 58:02:00                                                  |
| NA19403 (F)                                      | A/A                                              |                                                           | 35:01:01/35:01:03/35:40N/35:42/35:57/35:94                | 44:03:01/44:03:03/44:03:04                                |
| NA19404 (F)                                      | A/A                                              |                                                           | 53:01:01                                                  | 58:02:00                                                  |
| NA19428 (M)                                      | A/A                                              |                                                           | 18:01:01/18:01:03/18:17N                                  | 53:01:01                                                  |
| NA19429 (M)                                      | A/A                                              |                                                           | 15:03:01/15:103                                           | 41:01:00                                                  |
| NA19430 (M)                                      | A/A                                              |                                                           | 39:10:00                                                  | 58:01:01/58:11                                            |
| NA19431 (F)                                      | A/A                                              |                                                           | 15:10                                                     | 18:01:01/18:01:03/18:17N                                  |
| NA19434 (F)                                      | A/A                                              |                                                           | 81:01/81:02/81:03                                         | 81:01/81:02/81:03                                         |
| NA19435 (F)                                      | A/A                                              |                                                           | 15:10                                                     | 42:01:00                                                  |
| NA19436 (F)                                      | A/A                                              |                                                           | 15:10                                                     | 58:02:00                                                  |
| NA19437 (F)                                      | A/A                                              |                                                           | 18:01:01/18:01:03/18:17N                                  | 40:12:00                                                  |
| NA19438 (F)                                      | A/A                                              |                                                           | 49:01:01                                                  | 58:01:01/58:11                                            |
| NA19439 (F)                                      | A/A                                              |                                                           | 42:01:00                                                  | 58:02:00                                                  |
| NA19440 (F)                                      | A/A                                              |                                                           | 42:01:00                                                  | 45:01/45:07                                               |
| NA19443 (M)                                      | A/A                                              |                                                           | 08:01:01/08:19N                                           | 53:01:01                                                  |
| NA19445 (F)                                      | A/A                                              | 15:03:01/15:103                                           | 42:01:00                                                  |                                                           |
| NA19446 (F)                                      | A/A                                              | 45:01/45:07                                               | 51:01:01/51:01:05/51:01:07/51:11N/51:30/51:32/51:48/51:51 |                                                           |
| NA19448 (M)                                      | A/A                                              | 58:02:00                                                  | 81:01/81:02/81:03                                         |                                                           |
| NA19449 (F)                                      | A/A                                              | 57:02:00                                                  | 81:01/81:02/81:03                                         |                                                           |
| NA19451 (M)                                      | A/A                                              | 51:01:01/51:01:05/51:01:07/51:11N/51:30/51:32/51:48/51:51 | 58:01:01/58:11                                            |                                                           |
| NA19452 (M)                                      | A/A                                              | 15:03:01/15:103                                           | 53:01:01                                                  |                                                           |
| NA19455 (M)                                      | A/A                                              | 45:01/45:07                                               | 81:01/81:02/81:03                                         |                                                           |
| NA19456 (F)                                      | A/A                                              | 53:01:01                                                  | 58:01:01/58:11                                            |                                                           |
| NA19457 (F)                                      | A/A                                              | 08:01:01/08:19N                                           | 81:01/81:02/81:03                                         |                                                           |
| NA19462 (F)                                      | A/A                                              | 42:01:00                                                  | 45:01/45:07                                               |                                                           |
| NA19463 (F)                                      | A/A                                              | 53:01:01                                                  | 58:01:01/58:11                                            |                                                           |
| NA19466 (M)                                      | A/A                                              | 45:01/45:07                                               | 57:03:01                                                  |                                                           |
| NA19467 (F)                                      | A/A                                              | 53:01:01                                                  | 53:01:01                                                  |                                                           |
| NA19468 (F)                                      | A/A                                              | 81:01/81:02/81:03                                         | 81:01/81:02/81:03                                         |                                                           |
| NA19471 (F)                                      | A/A                                              | 53:01:01                                                  | 73:01:00                                                  |                                                           |
| NA19472 (F)                                      | A/A                                              | 45:01/45:07                                               | 45:01/45:07                                               |                                                           |

| Individual (1000 Genomes Project Phase 3 Naming) | rs144012689 Genotype (minus strand;1000 Genomes) | Population                                                | HLA-B Allele 1 (from NCBI dbMHC portal)                                | HLA-B Allele 2 (from NCBI dbMHC portal)                                |
|--------------------------------------------------|--------------------------------------------------|-----------------------------------------------------------|------------------------------------------------------------------------|------------------------------------------------------------------------|
| NA19473 (F)                                      | A/A                                              | 1000 Genomes - Colombian from Medellin, Colombia          | 58:02:00                                                               | 73:01:00                                                               |
| NA19474 (F)                                      | A/A                                              |                                                           | 45:01/45:07                                                            | 45:01/45:07                                                            |
| HG01112 (M)                                      | A/A                                              |                                                           | 38:01:01                                                               | 44:02:01:01/44:02:01:02S/44:19N/44:27/44:66                            |
| HG01113 (F)                                      | A/A                                              |                                                           | 35:43/35:67/35:79                                                      | 39:11:00                                                               |
| HG01124 (M)                                      | A/A                                              |                                                           | 40:04:00                                                               | 40:04:00                                                               |
| HG01125 (F)                                      | A/A                                              |                                                           | 15:01:01:01/15:01:01:02N/15:01:06/15:01:07/15:102/15:104/15:140/15:146 | 35:12:00                                                               |
| HG01133 (M)                                      | A/A                                              |                                                           | 08:01:01/08:19N                                                        | 35:01:01/35:01:03/35:40N/35:42/35:57/35:94                             |
| HG01134 (F)                                      | A/A                                              |                                                           | 39:08:00                                                               | 57:01:01                                                               |
| HG01136 (M)                                      | A/A                                              |                                                           | 35:01:01/35:01:03/35:40N/35:42/35:57/35:94                             | 53:01:01                                                               |
| HG01137 (F)                                      | A/A                                              |                                                           | 07:02:01/07:02:06/07:02:09/07:44/07:49N/07:58/07:59/07:61              | 15:01:01:01/15:01:01:02N/15:01:06/15:01:07/15:102/15:104/15:140/15:146 |
| HG01139 (M)                                      | A/A                                              |                                                           | 41:02:01                                                               | 50:01:00                                                               |
| HG01140 (F)                                      | A/A                                              |                                                           | 39:11:00                                                               | 44:03:01/44:03:03/44:03:04                                             |
| HG01148 (M)                                      | A/A                                              |                                                           | 07:02:01/07:02:06/07:02:09/07:44/07:49N/07:58/07:59/07:61              | 35:08:01                                                               |
| HG01149 (F)                                      | A/A                                              |                                                           | 35:43/35:67/35:79                                                      | 44:02:01:01/44:02:01:02S/44:19N/44:27/44:66                            |
| HG01250 (M)                                      | A/A                                              |                                                           | 35:12:00                                                               | 35:43/35:67/35:79                                                      |
| HG01251 (F)                                      | A/A                                              |                                                           | 35:43/35:67/35:79                                                      | 49:01:01                                                               |
| HG01253 (M)                                      | A/A                                              |                                                           | 14:02:01                                                               | 27:05:02/27:05:04/27:13                                                |
| HG01254 (F)                                      | A/A                                              |                                                           | 07:02:01/07:02:06/07:02:09/07:44/07:49N/07:58/07:59/07:61              | 44:02:01:01/44:02:01:02S/44:19N/44:27/44:66                            |
| HG01256 (M)                                      | A/A                                              |                                                           | 07:02:01/07:02:06/07:02:09/07:44/07:49N/07:58/07:59/07:61              | 15:01:01:01/15:01:01:02N/15:01:06/15:01:07/15:102/15:104/15:140/15:146 |
| HG01257 (F)                                      | A/A                                              |                                                           | 07:02:01/07:02:06/07:02:09/07:44/07:49N/07:58/07:59/07:61              | 18:01:01/18:01:03/18:17N                                               |
| HG01259 (M)                                      | A/A                                              |                                                           | 40:01:01/40:01:02/40:55                                                | 51:01:01/51:01:05/51:01:07/51:11N/51:30/51:32/51:48/51:51              |
| HG01260 (F)                                      | A/A                                              |                                                           | 07:02:01/07:02:06/07:02:09/07:44/07:49N/07:58/07:59/07:61              | 14:02:01                                                               |
| HG01271 (M)                                      | A/A                                              |                                                           | 35:43/35:67/35:79                                                      | 41:01:00                                                               |
| HG01272 (F)                                      | A/A                                              |                                                           | 35:01:01/35:01:03/35:40N/35:42/35:57/35:94                             | 44:03:01/44:03:03/44:03:04                                             |
| HG01275 (F)                                      | A/A                                              |                                                           | 07:02:01/07:02:06/07:02:09/07:44/07:49N/07:58/07:59/07:61              | 35:01:01/35:01:03/35:40N/35:42/35:57/35:94                             |
| HG01277 (M)                                      | A/A                                              |                                                           | 51:01:01/51:01:05/51:01:07/51:11N/51:30/51:32/51:48/51:51              | 57:01:01                                                               |
| HG01341 (M)                                      | A/A                                              |                                                           | 49:01:01                                                               | 51:01:01/51:01:05/51:01:07/51:11N/51:30/51:32/51:48/51:51              |
| HG01342 (F)                                      | A/A                                              |                                                           | 15:01:01:01/15:01:01:02N/15:01:06/15:01:07/15:102/15:104/15:140/15:146 | 53:01:01                                                               |
| HG01344 (M)                                      | A/A                                              |                                                           | 35:12:00                                                               | 51:01:01/51:01:05/51:01:07/51:11N/51:30/51:32/51:48/51:51              |
| HG01345 (F)                                      | A/A                                              |                                                           | 35:08:01                                                               | 38:01:01                                                               |
| HG01348 (F)                                      | A/A                                              |                                                           | 13:02:01/13:02:05                                                      | 44:03:01/44:03:03/44:03:04                                             |
| HG01350 (M)                                      | A/A                                              |                                                           | 40:04:00                                                               | 57:01:01                                                               |
| HG01351 (F)                                      | A/A                                              |                                                           | 35:01:01/35:01:03/35:40N/35:42/35:57/35:94                             | 49:01:01                                                               |
| HG01353 (M)                                      | A/A                                              |                                                           | 35:43/35:67/35:79                                                      | 38:01:01                                                               |
| HG01354 (F)                                      | A/A                                              |                                                           | 35:43/35:67/35:79                                                      | 49:01:01                                                               |
| HG01356 (M)                                      | A/A                                              |                                                           | 18:01:01/18:01:03/18:17N                                               | 35:43/35:67/35:79                                                      |
| HG01357 (F)                                      | A/A                                              |                                                           | 27:05:02/27:05:04/27:13                                                | 49:01:01                                                               |
| HG01359 (M)                                      | A/A                                              |                                                           | 50:01:00                                                               | 58:02:00                                                               |
| HG01360 (F)                                      | A/A                                              |                                                           | 42:01:00                                                               | 44:03:01/44:03:03/44:03:04                                             |
| HG01365 (M)                                      | A/A                                              |                                                           | 35:10:00                                                               | 53:01:01                                                               |
| HG01366 (F)                                      | A/A                                              |                                                           | 44:03:01/44:03:03/44:03:04                                             | 57:03:01                                                               |
| HG01374 (M)                                      | A/A                                              |                                                           | 35:01:01/35:01:03/35:40N/35:42/35:57/35:94                             | 35:01:01/35:01:03/35:40N/35:42/35:57/35:94                             |
| HG01375 (F)                                      | A/A                                              |                                                           | 14:02:01                                                               | 15:16                                                                  |
| HG01377 (M)                                      | A/A                                              |                                                           | 40:02:01/40:56/40:97                                                   | 51:01:01/51:01:05/51:01:07/51:11N/51:30/51:32/51:48/51:51              |
| HG01378 (F)                                      | A/A                                              |                                                           | 18:01:01/18:01:03/18:17N                                               | 35:10:00                                                               |
| HG01383 (M)                                      | A/A                                              |                                                           | 14:02:01                                                               | 53:01:01                                                               |
| HG01384 (F)                                      | A/A                                              | 07:02:01/07:02:06/07:02:09/07:44/07:49N/07:58/07:59/07:61 | 35:01:01/35:01:03/35:40N/35:42/35:57/35:94                             |                                                                        |
| HG01389 (M)                                      | A/A                                              | 44:03:01/44:03:03/44:03:04                                | 44:03:01/44:03:03/44:03:04                                             |                                                                        |
| HG01390 (F)                                      | A/A                                              | 14:02:01                                                  | 39:01:01:01/39:01:01:02L/39:01:03/39:46                                |                                                                        |
| HG01437 (M)                                      | A/A                                              | 39:06:02                                                  | 58:01:01/58:11                                                         |                                                                        |
| HG01438 (F)                                      | A/A                                              | 07:02:01/07:02:06/07:02:09/07:44/07:49N/07:58/07:59/07:61 | 07:02:01/07:02:06/07:02:09/07:44/07:49N/07:58/07:59/07:61              |                                                                        |
| HG01440 (M)                                      | A/A                                              | 08:01:01/08:19N                                           | 39:05:00                                                               |                                                                        |
| HG01441 (F)                                      | A/A                                              | 14:02:01                                                  | 39:05:00                                                               |                                                                        |
| HG01455 (M)                                      | A/A                                              | 35:05:00                                                  | 44:02:01:01/44:02:01:02S/44:19N/44:27/44:66                            |                                                                        |
| HG01456 (F)                                      | A/A                                              | 35:08:01                                                  | 40:02:01/40:56/40:97                                                   |                                                                        |
| HG01461 (M)                                      | A/A                                              | 40:02:01/40:56/40:97                                      | 58:01:01/58:11                                                         |                                                                        |

| Individual (1000 Genomes Project Phase 3 Naming) | rs144012689 Genotype (minus strand;1000 Genomes) | Population                                                             | HLA-B Allele 1 (from NCBI dbMHC portal)                   | HLA-B Allele 2 (from NCBI dbMHC portal)                                |
|--------------------------------------------------|--------------------------------------------------|------------------------------------------------------------------------|-----------------------------------------------------------|------------------------------------------------------------------------|
| HG01462 (F)                                      | A/A                                              |                                                                        | 35:08:01                                                  | 81:01/81:02/81:03                                                      |
| HG01464 (M)                                      | A/A                                              |                                                                        | 35:43/35:67/35:79                                         | 44:02:01:01/44:02:01:02S/44:19N/44:27/44:66                            |
| HG01465 (F)                                      | A/A                                              |                                                                        | 51:01:01/51:01:05/51:01:07/51:11N/51:30/51:32/51:48/51:51 | 51:01:01/51:01:05/51:01:07/51:11N/51:30/51:32/51:48/51:51              |
| HG01488 (M)                                      | A/A                                              |                                                                        | 39:11:00                                                  | 44:03:01/44:03:03/44:03:04                                             |
| HG01489 (F)                                      | A/A                                              |                                                                        | 15:17:01:01/15:17:01:02                                   | 35:01:01/35:01:03/35:40N/35:42/35:57/35:94                             |
| HG01491 (M)                                      | A/A                                              |                                                                        | 14:02:01                                                  | 57:01:01                                                               |
| HG01492 (F)                                      | A/A                                              |                                                                        | 39:06:02                                                  | 42:02:00                                                               |
| HG01494 (M)                                      | A/A                                              |                                                                        | 07:02:01/07:02:06/07:02:09/07:44/07:49N/07:58/07:59/07:61 | 35:43/35:67/35:79                                                      |
| HG01495 (F)                                      | A/A                                              |                                                                        | 18:01:01/18:01:03/18:17N                                  | 40:02:01/40:56/40:97                                                   |
| HG01497 (M)                                      | A/A                                              |                                                                        | 14:02:01                                                  | 15:01:01:01/15:01:01:02N/15:01:06/15:01:07/15:102/15:104/15:140/15:146 |
| HG01498 (F)                                      | A/A                                              |                                                                        | 35:01:01/35:01:03/35:40N/35:42/35:57/35:94                | 40:02:01/40:56/40:97                                                   |
| HG01550 (M)                                      | A/A                                              |                                                                        | 35:12:00                                                  | 51:01:01/51:01:05/51:01:07/51:11N/51:30/51:32/51:48/51:51              |
| HG01551 (F)                                      | A/A                                              |                                                                        | 07:05:01/07:06                                            | 15:16                                                                  |
| NA19648 (F)                                      | A/A                                              |                                                                        | 07:02:01/07:02:06/07:02:09/07:44/07:49N/07:58/07:59/07:61 | 51:01:01/51:01:05/51:01:07/51:11N/51:30/51:32/51:48/51:51              |
| NA19649 (M)                                      | A/A                                              |                                                                        | 08:01:01/08:19N                                           | 39:06:02                                                               |
| NA19651 (F)                                      | A/A                                              |                                                                        | 35:01:01/35:01:03/35:40N/35:42/35:57/35:94                | 40:20:00                                                               |
| NA19652 (M)                                      | A/A                                              |                                                                        | 35:08:01                                                  | 35:01:01/35:01:03/35:40N/35:42/35:57/35:94                             |
| NA19654 (F)                                      | A/A                                              |                                                                        | 18:06                                                     | 40:02:01/40:56/40:97                                                   |
| NA19655 (M)                                      | A/A                                              |                                                                        | 35:08:01                                                  | 44:03:01/44:03:03/44:03:04                                             |
| NA19657 (F)                                      | A/A                                              |                                                                        | 08:01:01/08:19N                                           | 52:01:02                                                               |
| NA19658 (M)                                      | A/A                                              |                                                                        | 44:03:01/44:03:03/44:03:04                                | 55:01:01/55:01:03                                                      |
| NA19661 (M)                                      | A/A                                              |                                                                        | 14:02:01                                                  | 40:02:01/40:56/40:97                                                   |
| NA19663 (F)                                      | A/A                                              |                                                                        | 14:02:01                                                  | 44:05:00                                                               |
| NA19664 (M)                                      | A/A                                              |                                                                        | 35:03:01/35:70                                            | 39:06:02                                                               |
| NA19669 (F)                                      | A/A                                              |                                                                        | 07:02:01/07:02:06/07:02:09/07:44/07:49N/07:58/07:59/07:61 | 15:03:01/15:103                                                        |
| NA19670 (M)                                      | A/A                                              | 14:02:01                                                               | 38:01:01                                                  |                                                                        |
| NA19676 (M)                                      | A/A                                              | 14:02:01                                                               | 35:01:01/35:01:03/35:40N/35:42/35:57/35:94                |                                                                        |
| NA19678 (F)                                      | A/A                                              | 14:01                                                                  | 35:14:01                                                  |                                                                        |
| NA19679 (M)                                      | A/A                                              | 14:02:01                                                               | 57:01:01                                                  |                                                                        |
| NA19681 (F)                                      | A/A                                              | 08:01:01/08:19N                                                        | 39:06:02                                                  |                                                                        |
| NA19682 (M)                                      | A/A                                              | 35:17:00                                                               | 47:01:01:01/47:01:01:02                                   |                                                                        |
| NA19684 (F)                                      | A/A                                              | 07:02:01/07:02:06/07:02:09/07:44/07:49N/07:58/07:59/07:61              | 35:17:00                                                  |                                                                        |
| NA19716 (F)                                      | A/A                                              | 18:01:01/18:01:03/18:17N                                               | 27:05:02/27:05:04/27:13                                   |                                                                        |
| NA19717 (M)                                      | A/A                                              | 14:02:01                                                               | 15:15                                                     |                                                                        |
| NA19719 (F)                                      | A/A                                              | 35:03:01/35:70                                                         | 51:23:00                                                  |                                                                        |
| NA19720 (M)                                      | A/A                                              | 15:15                                                                  | 48:01:01/48:09                                            |                                                                        |
| NA19722 (F)                                      | A/A                                              | 18:01:01/18:01:03/18:17N                                               | 44:02:01:01/44:02:01:02S/44:19N/44:27/44:66               |                                                                        |
| NA19723 (M)                                      | A/A                                              | 15:15                                                                  | 40:02:01/40:56/40:97                                      |                                                                        |
| NA19725 (F)                                      | A/A                                              | 38:01:01                                                               | 52:01:01/52:07                                            |                                                                        |
| NA19726 (M)                                      | A/A                                              | 15:01:01:01/15:01:01:02N/15:01:06/15:01:07/15:102/15:104/15:140/15:146 | 39:05:00                                                  |                                                                        |
| NA19728 (F)                                      | A/A                                              | 35:12:00                                                               | 40:05:00                                                  |                                                                        |
| NA19729 (M)                                      | A/A                                              | 35:12:00                                                               | 48:01:01/48:09                                            |                                                                        |
| NA19731 (F)                                      | A/A                                              | 35:17:00                                                               | 51:02:01                                                  |                                                                        |
| NA19732 (M)                                      | A/A                                              | 48:01:01/48:09                                                         | 51:01:01/51:01:05/51:01:07/51:11N/51:30/51:32/51:48/51:51 |                                                                        |
| NA19746 (F)                                      | A/A                                              | 35:17:00                                                               | 58:02:00                                                  |                                                                        |
| NA19747 (M)                                      | A/A                                              | 14:02:01                                                               | 45:01/45:07                                               |                                                                        |
| NA19749 (F)                                      | A/A                                              | 07:02:01/07:02:06/07:02:09/07:44/07:49N/07:58/07:59/07:61              | 18:01:01/18:01:03/18:17N                                  |                                                                        |
| NA19750 (M)                                      | A/A                                              | 41:01:00                                                               | 51:01:01/51:01:05/51:01:07/51:11N/51:30/51:32/51:48/51:51 |                                                                        |
| NA19755 (F)                                      | A/A                                              | 35:17:00                                                               | 51:01:01/51:01:05/51:01:07/51:11N/51:30/51:32/51:48/51:51 |                                                                        |
| NA19756 (M)                                      | A/A                                              | 13:02:01/13:02:05                                                      | 14:01                                                     |                                                                        |
| NA19758 (F)                                      | A/A                                              | 35:14:01                                                               | 48:03:01                                                  |                                                                        |
| NA19759 (M)                                      | A/A                                              | 35:05:00                                                               | 39:06:02                                                  |                                                                        |
| NA19761 (F)                                      | A/A                                              | 41:01:00                                                               | 48:01:01/48:09                                            |                                                                        |
| NA19762 (M)                                      | A/A                                              | 18:01:01/18:01:03/18:17N                                               | 35:17:00                                                  |                                                                        |
| NA19770 (F)                                      | A/A                                              | 18:01:01/18:01:03/18:17N                                               | 51:02:01                                                  |                                                                        |
| NA19771 (M)                                      | A/A                                              | 15:16                                                                  | 44:03:01/44:03:03/44:03:04                                |                                                                        |

1000 Genomes - Mexican Ancestry from Los Angeles-California, USA

| Individual (1000 Genomes Project Phase 3 Naming) | rs144012689 Genotype (minus strand;1000 Genomes) | Population                                                | HLA-B Allele 1 (from NCBI dbMHC portal)                             | HLA-B Allele 2 (from NCBI dbMHC portal)                   |
|--------------------------------------------------|--------------------------------------------------|-----------------------------------------------------------|---------------------------------------------------------------------|-----------------------------------------------------------|
| NA19773 (F)                                      | A/A                                              | 1000 Genomes - Puerto Rican, Puerto Rico                  | 14:02:01                                                            | 41:02:01                                                  |
| NA19774 (M)                                      | A/A                                              |                                                           | 27:05:02/27:05:04/27:13                                             | 51:01:01/51:01:05/51:01:07/51:11N/51:30/51:32/51:48/51:51 |
| NA19776 (F)                                      | A/A                                              |                                                           | 07:02:01/07:02:06/07:02:09/07:44/07:49N/07:58/07:59/07:61           | 35:01:01/35:01:03/35:40N/35:42/35:57/35:94                |
| NA19777 (M)                                      | A/A                                              |                                                           | 15:01:01/15:01:01:02N/15:01:06/15:01:07/15:102/15:104/15:140/15:146 | 35:01:01/35:01:03/35:40N/35:42/35:57/35:94                |
| NA19780 (M)                                      | A/A                                              |                                                           | 40:02:01/40:56/40:97                                                | 48:01:01/48:09                                            |
| NA19782 (F)                                      | A/A                                              |                                                           | 35:01:01/35:01:03/35:40N/35:42/35:57/35:94                          | 42:02:00                                                  |
| NA19783 (M)                                      | A/A                                              |                                                           | 44:03:01/44:03:03/44:03:04                                          | 50:01:00                                                  |
| NA19785 (F)                                      | A/A                                              |                                                           | 15:01:01/15:01:01:02N/15:01:06/15:01:07/15:102/15:104/15:140/15:146 | 52:01:02                                                  |
| NA19786 (M)                                      | A/A                                              |                                                           | 18:01:01/18:01:03/18:17N                                            | 35:02:01                                                  |
| NA19788 (F)                                      | A/A                                              |                                                           | 45:01/45:07                                                         | 82:01:00                                                  |
| NA19789 (M)                                      | A/A                                              |                                                           | 18:01:01/18:01:03/18:17N                                            | 35:17:00                                                  |
| NA19794 (F)                                      | A/A                                              |                                                           | 51:01:01/51:01:05/51:01:07/51:11N/51:30/51:32/51:48/51:51           | 56:01/56:24                                               |
| NA19795 (M)                                      | A/A                                              |                                                           | 35:17:00                                                            | 48:01:01/48:09                                            |
| HG00551 (F)                                      | A/A                                              |                                                           | 44:03:01/44:03:03/44:03:04                                          | 50:01:00                                                  |
| HG00553 (M)                                      | A/A                                              |                                                           | 44:03:02                                                            | 58:01:01/58:11                                            |
| HG00554 (F)                                      | A/A                                              |                                                           | 35:01:01/35:01:03/35:40N/35:42/35:57/35:94                          | 39:01:01/39:01:01:02L/39:01:03/39:46                      |
| HG00637 (M)                                      | A/A                                              |                                                           | 44:02:01:01/44:02:01:02S/44:19N/44:27/44:66                         | 45:01/45:07                                               |
| HG00638 (F)                                      | A/A                                              |                                                           | 35:01:01/35:01:03/35:40N/35:42/35:57/35:94                          | 51:01:01/51:01:05/51:01:07/51:11N/51:30/51:32/51:48/51:51 |
| HG00640 (M)                                      | A/A                                              |                                                           | 07:05:01/07:06                                                      | 18:01:01/18:01:03/18:17N                                  |
| HG00641 (F)                                      | A/A                                              |                                                           | 07:02:01/07:02:06/07:02:09/07:44/07:49N/07:58/07:59/07:61           | 15:03:01/15:103                                           |
| HG00731 (M)                                      | A/A                                              |                                                           | 08:01:01/08:19N                                                     | 35:02:01                                                  |
| HG00732 (F)                                      | A/A                                              |                                                           | 18:01:01/18:01:03/18:17N                                            | 35:01:01/35:01:03/35:40N/35:42/35:57/35:94                |
| HG00734 (F)                                      | A/A                                              |                                                           | 07:02:01/07:02:06/07:02:09/07:44/07:49N/07:58/07:59/07:61           | 14:02:01                                                  |
| HG00736 (M)                                      | A/A                                              |                                                           | 08:01:01/08:19N                                                     | 58:01:01/58:11                                            |
| HG00737 (F)                                      | A/A                                              |                                                           | 35:01:01/35:01:03/35:40N/35:42/35:57/35:94                          | 51:01:01/51:01:05/51:01:07/51:11N/51:30/51:32/51:48/51:51 |
| HG00739 (M)                                      | A/A                                              |                                                           | 35:01:01/35:01:03/35:40N/35:42/35:57/35:94                          | 57:01:01                                                  |
| HG00740 (F)                                      | A/A                                              |                                                           | 27:05:02/27:05:04/27:13                                             | 57:03:01                                                  |
| HG01047 (M)                                      | A/A                                              |                                                           | 07:02:01/07:02:06/07:02:09/07:44/07:49N/07:58/07:59/07:61           | 56:01/56:24                                               |
| HG01048 (M)                                      | A/A                                              |                                                           | 40:01:01/40:01:02/40:55                                             | 44:02:01:01/44:02:01:02S/44:19N/44:27/44:66               |
| HG01049 (F)                                      | A/A                                              |                                                           | 44:03:01/44:03:03/44:03:04                                          | 51:01:01/51:01:05/51:01:07/51:11N/51:30/51:32/51:48/51:51 |
| HG01051 (M)                                      | A/A                                              |                                                           | 15:16                                                               | 35:03:01/35:70                                            |
| HG01052 (F)                                      | A/A                                              |                                                           | 15:10                                                               | 52:01:01/52:07                                            |
| HG01054 (M)                                      | A/A                                              | 08:01:01/08:19N                                           | 57:03:01                                                            |                                                           |
| HG01055 (F)                                      | A/A                                              | 35:02:01                                                  | 40:04:00                                                            |                                                           |
| HG01060 (M)                                      | A/A                                              | 35:03:01/35:70                                            | 56:01/56:24                                                         |                                                           |
| HG01061 (F)                                      | A/A                                              | 44:03:01/44:03:03/44:03:04                                | 44:03:01/44:03:03/44:03:04                                          |                                                           |
| HG01066 (M)                                      | A/A                                              | 18:01:01/18:01:03/18:17N                                  | 51:01:01/51:01:05/51:01:07/51:11N/51:30/51:32/51:48/51:51           |                                                           |
| HG01067 (F)                                      | A/A                                              | 07:02:01/07:02:06/07:02:09/07:44/07:49N/07:58/07:59/07:61 | 18:01:01/18:01:03/18:17N                                            |                                                           |
| HG01069 (M)                                      | A/A                                              | 08:01:01/08:19N                                           | 44:02:01:01/44:02:01:02S/44:19N/44:27/44:66                         |                                                           |
| HG01070 (F)                                      | A/A                                              | 08:01:01/08:19N                                           | 40:01:01/40:01:02/40:55                                             |                                                           |
| HG01072 (M)                                      | A/A                                              | 14:02:01                                                  | 50:01:00                                                            |                                                           |
| HG01073 (F)                                      | A/A                                              | 44:03:01/44:03:03/44:03:04                                | 44:03:01/44:03:03/44:03:04                                          |                                                           |
| HG01075 (M)                                      | A/A                                              | 14:02:01                                                  | 14:02:01                                                            |                                                           |
| HG01079 (M)                                      | A/A                                              | 39:01:01:01/39:01:01:02L/39:01:03/39:46                   | 40:02:01/40:56/40:97                                                |                                                           |
| HG01080 (F)                                      | A/A                                              | 15:18                                                     | 15:03:01/15:103                                                     |                                                           |
| HG01082 (M)                                      | A/A                                              | 39:05:00                                                  | 44:03:01/44:03:03/44:03:04                                          |                                                           |
| HG01083 (F)                                      | A/A                                              | 44:02:01:01/44:02:01:02S/44:19N/44:27/44:66               | 51:01:01/51:01:05/51:01:07/51:11N/51:30/51:32/51:48/51:51           |                                                           |
| HG01085 (M)                                      | A/A                                              | 18:01:01/18:01:03/18:17N                                  | 35:11:00                                                            |                                                           |
| HG01086 (F)                                      | A/A                                              | 07:02:01/07:02:06/07:02:09/07:44/07:49N/07:58/07:59/07:61 | 42:01:00                                                            |                                                           |
| HG01094 (M)                                      | A/A                                              | 44:02:01:01/44:02:01:02S/44:19N/44:27/44:66               | 52:01:02                                                            |                                                           |
| HG01095 (F)                                      | A/A                                              | 14:02:01                                                  | 35:11:00                                                            |                                                           |
| HG01097 (M)                                      | A/A                                              | 40:02:01/40:56/40:97                                      | 51:01:01/51:01:05/51:01:07/51:11N/51:30/51:32/51:48/51:51           |                                                           |
| HG01098 (F)                                      | A/A                                              | 40:02:01/40:56/40:97                                      | 44:03:01/44:03:03/44:03:04                                          |                                                           |
| HG01101 (M)                                      | A/A                                              | 08:01:01/08:19N                                           | 35:01:01/35:01:03/35:40N/35:42/35:57/35:94                          |                                                           |
| HG01102 (F)                                      | A/A                                              | 15:16                                                     | 40:01:01/40:01:02/40:55                                             |                                                           |
| HG01104 (M)                                      | A/A                                              | 14:02:01                                                  | 40:02:01/40:56/40:97                                                |                                                           |

| Individual (1000 Genomes Project Phase 3 Naming) | rs144012689 Genotype (minus strand;1000 Genomes) | Population                                                                                  | HLA-B Allele 1 (from NCBI dbMHC portal)                             | HLA-B Allele 2 (from NCBI dbMHC portal)                   |
|--------------------------------------------------|--------------------------------------------------|---------------------------------------------------------------------------------------------|---------------------------------------------------------------------|-----------------------------------------------------------|
| HG01105 (F)                                      | A/A                                              | African and African American from Yoruba, Luhya, Mende, and Western European from Utah, USA | 35:01:01/35:01:03/35:40N/35:42/35:57/35:94                          | 49:01:01                                                  |
| HG01107 (M)                                      | A/A                                              |                                                                                             | 35:03:01/35:70                                                      | 52:01:02                                                  |
| HG01108 (F)                                      | A/A                                              |                                                                                             | 35:01:01/35:01:03/35:40N/35:42/35:57/35:94                          | 44:02:01:01/44:02:01:02S/44:19N/44:27/44:66               |
| HG01110 (M)                                      | A/A                                              |                                                                                             | 35:02:01                                                            | 45:01/45:07                                               |
| HG01111 (F)                                      | A/A                                              |                                                                                             | 14:02:01                                                            | 35:01:01/35:01:03/35:40N/35:42/35:57/35:94                |
| HG01167 (M)                                      | A/A                                              |                                                                                             | 45:01/45:07                                                         | 48:02:00                                                  |
| HG01168 (F)                                      | A/A                                              |                                                                                             | 18:05                                                               | 52:01:02                                                  |
| HG01170 (M)                                      | A/A                                              |                                                                                             | 15:01:01/15:01:01:02N/15:01:06/15:01:07/15:102/15:104/15:140/15:146 | 35:01:01/35:01:03/35:40N/35:42/35:57/35:94                |
| HG01171 (F)                                      | A/A                                              |                                                                                             | 07:02:01/07:02:06/07:02:09/07:44/07:49N/07:58/07:59/07:61           | 56:01/56:24                                               |
| HG01173 (M)                                      | A/A                                              |                                                                                             | 07:02:01/07:02:06/07:02:09/07:44/07:49N/07:58/07:59/07:61           | 07:02:01/07:02:06/07:02:09/07:44/07:49N/07:58/07:59/07:61 |
| HG01174 (F)                                      | A/A                                              |                                                                                             | 35:12:00                                                            | 53:01:01                                                  |
| HG01176 (M)                                      | A/A                                              |                                                                                             | 07:05:01/07:06                                                      | 44:03:01/44:03:03/44:03:04                                |
| HG01177 (F)                                      | A/A                                              |                                                                                             | 51:01:01/51:01:05/51:01:07/51:11N/51:30/51:32/51:48/51:51           | 53:01:01                                                  |
| HG01182 (M)                                      | A/A                                              |                                                                                             | 35:08:01                                                            | 44:03:01/44:03:03/44:03:04                                |
| HG01183 (F)                                      | A/A                                              |                                                                                             | 35:03:01/35:70                                                      | 78:01:00                                                  |
| HG01187 (M)                                      | A/A                                              |                                                                                             | 44:02:01:01/44:02:01:02S/44:19N/44:27/44:66                         | 57:01:01                                                  |
| HG01188 (F)                                      | A/A                                              |                                                                                             | 35:02:01                                                            | 44:03:01/44:03:03/44:03:04                                |
| HG01190 (M)                                      | A/A                                              |                                                                                             | 15:20                                                               | 18:01:01/18:01:03/18:17N                                  |
| HG01191 (F)                                      | A/A                                              |                                                                                             | 07:02:01/07:02:06/07:02:09/07:44/07:49N/07:58/07:59/07:61           | 39:05:00                                                  |
| HG01197 (M)                                      | A/A                                              |                                                                                             | 07:02:01/07:02:06/07:02:09/07:44/07:49N/07:58/07:59/07:61           | 56:01/56:24                                               |
| HG01198 (F)                                      | A/A                                              |                                                                                             | 40:01:01/40:01:02/40:55                                             | 44:03:01/44:03:03/44:03:04                                |
| HG01204 (M)                                      | A/A                                              |                                                                                             | 15:01:01/15:01:01:02N/15:01:06/15:01:07/15:102/15:104/15:140/15:146 | 44:03:01/44:03:03/44:03:04                                |
| HG01205 (F)                                      | A/A                                              |                                                                                             | 07:02:01/07:02:06/07:02:09/07:44/07:49N/07:58/07:59/07:61           | 35:01:01/35:01:03/35:40N/35:42/35:57/35:94                |
| HG01241 (M)                                      | A/A                                              |                                                                                             | 07:02:01/07:02:06/07:02:09/07:44/07:49N/07:58/07:59/07:61           | 15:03:01/15:103                                           |
| HG01242 (F)                                      | A/A                                              |                                                                                             | 35:01:01/35:01:03/35:40N/35:42/35:57/35:94                          | 44:03:01/44:03:03/44:03:04                                |
| HG01247 (M)                                      | A/A                                              |                                                                                             | 52:01:01/52:07                                                      | 57:01:01                                                  |
| HG01248 (F)                                      | A/A                                              |                                                                                             | 14:02:01                                                            | 51:01:01/51:01:05/51:01:07/51:11N/51:30/51:32/51:48/51:51 |
| NA06985 (F)                                      | A/A                                              |                                                                                             | 7:02:01                                                             | 57:01:00                                                  |
| NA06986 (M)                                      | A/A                                              |                                                                                             | 44:03:01/44:03:03/44:03:04                                          | 44:03:01/44:03:03/44:03:04                                |
| NA06994 (M)                                      | A/A                                              |                                                                                             | 40:02:00                                                            | 8:01                                                      |
| NA07000 (F)                                      | A/A                                              |                                                                                             | 44:02:00                                                            | 40:01:00                                                  |
| NA07037 (F)                                      | A/A                                              |                                                                                             | 15:10                                                               | 40:01:00                                                  |
| NA07048 (M)                                      | A/A                                              |                                                                                             | 44:02:01:01                                                         | 7:02                                                      |
| NA07051 (M)                                      | A/A                                              |                                                                                             | 15:01/15:12/15:19                                                   | 7:02                                                      |
| NA07056 (F)                                      | A/A                                              |                                                                                             | 8:01                                                                | 57:01:00                                                  |
| NA07347 (M)                                      | A/A                                              |                                                                                             | 18:01                                                               | 44:02:00                                                  |
| NA07357 (M)                                      | A/A                                              |                                                                                             | 8:01                                                                | 39:06:00                                                  |
| NA10847 (F)                                      | A/A                                              |                                                                                             | 8:01                                                                | 18:01                                                     |
| NA10851 (M)                                      | A/A                                              |                                                                                             | 40:01:00                                                            | 8:01                                                      |
| NA11829 (M)                                      | A/A                                              |                                                                                             | 15:01/15:28                                                         | 44:02:00                                                  |
| NA11830 (F)                                      | A/A                                              | 14:01                                                                                       | 14:02                                                               |                                                           |
| NA11831 (M)                                      | A/A                                              | 8:01                                                                                        | 7:02                                                                |                                                           |
| NA11832 (F)                                      | A/A                                              | 40:02:00                                                                                    | 27:03/27:51/27:52/27:09                                             |                                                           |
| NA11840 (F)                                      | A/A                                              | 27:03:00                                                                                    | 57:01:00                                                            |                                                           |
| NA11843 (M)                                      | A/A                                              | 15:01                                                                                       | 51:01:00                                                            |                                                           |
| NA11881 (M)                                      | A/A                                              | 7:02                                                                                        | 7:02                                                                |                                                           |
| NA11892 (F)                                      | A/A                                              | 13:02:01/13:02:05                                                                           | 49:01:00                                                            |                                                           |
| NA11893 (M)                                      | A/A                                              | 15:01/15:28                                                                                 | 44:02:00                                                            |                                                           |
| NA11894 (F)                                      | A/A                                              | 8:01                                                                                        | 55:01:01/55:01:03                                                   |                                                           |
| NA11918 (F)                                      | A/A                                              | 7:02                                                                                        | 44:02:00                                                            |                                                           |
| NA11919 (M)                                      | A/A                                              | 15:01                                                                                       | 57:01:00                                                            |                                                           |
| NA11920 (F)                                      | A/A                                              | 44:02:00                                                                                    | 55:01:01/55:01:03/55:02                                             |                                                           |
| NA11930 (M)                                      | A/A                                              | 13:02:01/13:02:05                                                                           | 13:02:01/13:02:05                                                   |                                                           |
| NA11931 (F)                                      | A/A                                              | 44:02:00                                                                                    | 7:02                                                                |                                                           |
| NA11992 (M)                                      | A/A                                              | 35:01:00                                                                                    | 8:01                                                                |                                                           |
| NA11994 (M)                                      | A/A                                              | 7:02                                                                                        | 51:01:00                                                            |                                                           |

| Individual (1000 Genomes Project Phase 3 Naming) | rs144012689 Genotype (minus strand;1000 Genomes) | Population                                                             | HLA-B Allele 1 (from NCBI dbMHC portal)                                | HLA-B Allele 2 (from NCBI dbMHC portal)                   |
|--------------------------------------------------|--------------------------------------------------|------------------------------------------------------------------------|------------------------------------------------------------------------|-----------------------------------------------------------|
| NA11995 (F)                                      | A/A                                              | 1000 Genomes - Northern                                                | 57:01:00                                                               | 8:01                                                      |
| NA12003 (M)                                      | A/A                                              |                                                                        | 8:01                                                                   | 13:02:01/13:02:05                                         |
| NA12004 (F)                                      | A/A                                              |                                                                        | 7:02                                                                   | 7:02                                                      |
| NA12005 (M)                                      | A/A                                              |                                                                        | 7:02                                                                   | 27:03/27:52/27:09                                         |
| NA12006 (F)                                      | A/A                                              |                                                                        | 18:01                                                                  | 15:01/15:12/15:19                                         |
| NA12043 (M)                                      | A/A                                              |                                                                        | 35:01:00                                                               | 38:01:01                                                  |
| NA12044 (F)                                      | A/A                                              |                                                                        | 7:02                                                                   | 7:02                                                      |
| NA12045 (M)                                      | A/A                                              |                                                                        | 35:01:00                                                               | 44:02:00                                                  |
| NA12046 (F)                                      | A/A                                              |                                                                        | 57:01:00                                                               | 50:01:01                                                  |
| NA12058 (F)                                      | A/A                                              |                                                                        | 40:01:00                                                               | 40:01:00                                                  |
| NA12144 (M)                                      | A/A                                              |                                                                        | 35:01/35:07                                                            | 44:02:00                                                  |
| NA12154 (M)                                      | A/A                                              |                                                                        | 8:01                                                                   | 40:01:00                                                  |
| NA12155 (M)                                      | A/A                                              |                                                                        | 8:01                                                                   | 44:02:00                                                  |
| NA12156 (F)                                      | A/A                                              |                                                                        | 51:01:00                                                               | 50:01:01                                                  |
| NA12234 (F)                                      | A/A                                              |                                                                        | 44:03:01/44:03:03/44:03:04                                             | 40:02:00                                                  |
| NA12249 (F)                                      | A/A                                              |                                                                        | 40:01:00                                                               | 44                                                        |
| NA12272 (M)                                      | A/A                                              |                                                                        | 44:02:00                                                               | 44:02:00                                                  |
| NA12273 (F)                                      | A/A                                              |                                                                        | 35:01/35:07                                                            | 44:02:00                                                  |
| NA12275 (F)                                      | A/A                                              |                                                                        | 14:01                                                                  | 7:02                                                      |
| NA12282 (M)                                      | A/A                                              |                                                                        | 8:01                                                                   | 37:01:00                                                  |
| NA12283 (F)                                      | A/A                                              |                                                                        | 15:01/15:12/15:19                                                      | 57:01:00                                                  |
| NA12286 (M)                                      | A/A                                              |                                                                        | 57:01:00                                                               | 13:02:01/13:02:05                                         |
| NA12287 (F)                                      | A/A                                              |                                                                        | 15:01/15:03                                                            | 15:01/15:26/15:12/15:19                                   |
| HG00171 (F)                                      | A/A                                              |                                                                        | 13:02:01/13:02:05                                                      | 51:01:01/51:01:05/51:01:07/51:11N/51:30/51:32/51:48/51:51 |
| HG00173 (F)                                      | A/A                                              |                                                                        | 40:01:01/40:01:02/40:55                                                | 44:02:01:01/44:02:01:02S/44:19N/44:27/44:66               |
| HG00174 (F)                                      | A/A                                              |                                                                        | 15:01:01:01/15:01:01:02N/15:01:06/15:01:07/15:102/15:104/15:140/15:146 | 38:01:01                                                  |
| HG00176 (F)                                      | A/A                                              | 15:01:01:01/15:01:01:02N/15:01:06/15:01:07/15:102/15:104/15:140/15:146 | 35:01:01/35:01:03/35:40N/35:42/35:57/35:94                             |                                                           |
| HG00177 (F)                                      | A/A                                              | 13:02:01/13:02:05                                                      | 40:01:01/40:01:02/40:55                                                |                                                           |
| HG00178 (F)                                      | A/A                                              | 07:02:01/07:02:06/07:02:09/07:44/07:49N/07:58/07:59/07:61              | 08:01:01/08:19N                                                        |                                                           |
| HG00179 (F)                                      | A/A                                              | 07:02:01/07:02:06/07:02:09/07:44/07:49N/07:58/07:59/07:61              | 35:01:01/35:01:03/35:40N/35:42/35:57/35:94                             |                                                           |
| HG00180 (F)                                      | A/A                                              | 40:02:01/40:56/40:97                                                   | 41:01:00                                                               |                                                           |
| HG00181 (M)                                      | A/A                                              | 15:01:01:01/15:01:01:02N/15:01:06/15:01:07/15:102/15:104/15:140/15:146 | 55:01:01/55:01:03                                                      |                                                           |
| HG00182 (M)                                      | A/A                                              | 35:01:01/35:01:03/35:40N/35:42/35:57/35:94                             | 44:02:01:01/44:02:01:02S/44:19N/44:27/44:66                            |                                                           |
| HG00183 (M)                                      | A/A                                              | 40:02:01/40:56/40:97                                                   | 55:01:01/55:01:03                                                      |                                                           |
| HG00185 (M)                                      | A/A                                              | 40:02:01/40:56/40:97                                                   | 44:02:01:01/44:02:01:02S/44:19N/44:27/44:66                            |                                                           |
| HG00186 (M)                                      | A/A                                              | 15:18                                                                  | 27:05:02/27:05:04/27:13                                                |                                                           |
| HG00187 (M)                                      | A/A                                              | 15:01:01:01/15:01:01:02N/15:01:06/15:01:07/15:102/15:104/15:140/15:146 | 55:01:01/55:01:03                                                      |                                                           |
| HG00188 (M)                                      | A/A                                              | 39:01:01:01/39:01:01:02L/39:01:03/39:46                                | 44:03:01/44:03:03/44:03:04                                             |                                                           |
| HG00189 (M)                                      | A/A                                              | 07:02:01/07:02:06/07:02:09/07:44/07:49N/07:58/07:59/07:61              | 08:01:01/08:19N                                                        |                                                           |
| HG00190 (M)                                      | A/A                                              | 35:01:01/35:01:03/35:40N/35:42/35:57/35:94                             | 35:01:01/35:01:03/35:40N/35:42/35:57/35:94                             |                                                           |
| HG00266 (F)                                      | A/A                                              | 08:01:01/08:19N                                                        | 35:01:01/35:01:03/35:40N/35:42/35:57/35:94                             |                                                           |
| HG00267 (M)                                      | A/A                                              | 41:01:00                                                               | 57:01:01                                                               |                                                           |
| HG00268 (F)                                      | A/A                                              | 07:02:01/07:02:06/07:02:09/07:44/07:49N/07:58/07:59/07:61              | 18:01:01/18:01:03/18:17N                                               |                                                           |
| HG00269 (F)                                      | A/A                                              | 07:02:01/07:02:06/07:02:09/07:44/07:49N/07:58/07:59/07:61              | 35:01:01/35:01:03/35:40N/35:42/35:57/35:94                             |                                                           |
| HG00271 (M)                                      | A/A                                              | 27:05:02/27:05:04/27:13                                                | 47:01:01:01/47:01:01:02                                                |                                                           |
| HG00272 (F)                                      | A/A                                              | 08:01:01/08:19N                                                        | 15:01:01:01/15:01:01:02N/15:01:06/15:01:07/15:102/15:104/15:140/15:146 |                                                           |
| HG00273 (M)                                      | A/A                                              | 07:02:01/07:02:06/07:02:09/07:44/07:49N/07:58/07:59/07:61              | 35:01:01/35:01:03/35:40N/35:42/35:57/35:94                             |                                                           |
| HG00274 (F)                                      | A/A                                              | 15:01:01:01/15:01:01:02N/15:01:06/15:01:07/15:102/15:104/15:140/15:146 | 35:01:01/35:01:03/35:40N/35:42/35:57/35:94                             |                                                           |
| HG00275 (F)                                      | A/A                                              | 07:02:01/07:02:06/07:02:09/07:44/07:49N/07:58/07:59/07:61              | 15:01:01:01/15:01:01:02N/15:01:06/15:01:07/15:102/15:104/15:140/15:146 |                                                           |
| HG00276 (F)                                      | A/A                                              | 35:01:01/35:01:03/35:40N/35:42/35:57/35:94                             | 51:01:01/51:01:05/51:01:07/51:11N/51:30/51:32/51:48/51:51              |                                                           |
| HG00277 (M)                                      | A/A                                              | 07:02:01/07:02:06/07:02:09/07:44/07:49N/07:58/07:59/07:61              | 56:01/56:24                                                            |                                                           |
| HG00278 (M)                                      | A/A                                              | 39:01:01:01/39:01:01:02L/39:01:03/39:46                                | 51:01:01/51:01:05/51:01:07/51:11N/51:30/51:32/51:48/51:51              |                                                           |
| HG00280 (M)                                      | A/A                                              | 08:01:01/08:19N                                                        | 27:05:02/27:05:04/27:13                                                |                                                           |
| HG00281 (F)                                      | A/A                                              | 15:01:01:01/15:01:01:02N/15:01:06/15:01:07/15:102/15:104/15:140/15:146 | 35:01:01/35:01:03/35:40N/35:42/35:57/35:94                             |                                                           |
| HG00282 (F)                                      | A/A                                              | 07:02:01/07:02:06/07:02:09/07:44/07:49N/07:58/07:59/07:61              | 40:01:01/40:01:02/40:55                                                |                                                           |
| HG00284 (M)                                      | A/A                                              | 08:01:01/08:19N                                                        | 57:01:01                                                               |                                                           |



| Individual (1000 Genomes Project Phase 3 Naming) | rs144012689 Genotype (minus strand;1000 Genomes) | Population                                                             | HLA-B Allele 1 (from NCBI dbMHC portal)                                | HLA-B Allele 2 (from NCBI dbMHC portal)                                |
|--------------------------------------------------|--------------------------------------------------|------------------------------------------------------------------------|------------------------------------------------------------------------|------------------------------------------------------------------------|
| HG00285 (F)                                      | A/A                                              | 1000 Genomes - Finnish, Finland                                        | 15:01:01:01/15:01:01:02N/15:01:06/15:01:07/15:102/15:104/15:140/15:146 | 40:01:01/40:01:02/40:55                                                |
| HG00306 (F)                                      | A/A                                              |                                                                        | 08:01:01/08:19N                                                        | 27:05:02/27:05:04/27:13                                                |
| HG00308 (M)                                      | A/A                                              |                                                                        | 35:01:01/35:01:03/35:40N/35:42/35:57/35:94                             | 35:01:01/35:01:03/35:40N/35:42/35:57/35:94                             |
| HG00309 (F)                                      | A/A                                              |                                                                        | 27:05:02/27:05:04/27:13                                                | 35:01:01/35:01:03/35:40N/35:42/35:57/35:94                             |
| HG00310 (M)                                      | A/A                                              |                                                                        | 07:02:01/07:02:06/07:02:09/07:44/07:49N/07:58/07:59/07:61              | 15:01:01:01/15:01:01:02N/15:01:06/15:01:07/15:102/15:104/15:140/15:146 |
| HG00311 (M)                                      | A/A                                              |                                                                        | 07:02:01/07:02:06/07:02:09/07:44/07:49N/07:58/07:59/07:61              | 44:02:01:01/44:02:01:02S/44:19N/44:27/44:66                            |
| HG00313 (F)                                      | A/A                                              |                                                                        | 07:02:01/07:02:06/07:02:09/07:44/07:49N/07:58/07:59/07:61              | 35:01:01/35:01:03/35:40N/35:42/35:57/35:94                             |
| HG00315 (F)                                      | A/A                                              |                                                                        | 13:02:01/13:02:05                                                      | 56:01/56:24                                                            |
| HG00318 (F)                                      | A/A                                              |                                                                        | 07:02:01/07:02:06/07:02:09/07:44/07:49N/07:58/07:59/07:61              | 13:02:01/13:02:05                                                      |
| HG00319 (F)                                      | A/A                                              |                                                                        | 07:02:01/07:02:06/07:02:09/07:44/07:49N/07:58/07:59/07:61              | 56:01/56:24                                                            |
| HG00320 (F)                                      | A/A                                              |                                                                        | 15:01:01:01/15:01:01:02N/15:01:06/15:01:07/15:102/15:104/15:140/15:146 | 35:01:01/35:01:03/35:40N/35:42/35:57/35:94                             |
| HG00321 (M)                                      | A/A                                              |                                                                        | 15:01:01:01/15:01:01:02N/15:01:06/15:01:07/15:102/15:104/15:140/15:146 | 40:01:01/40:01:02/40:55                                                |
| HG00323 (F)                                      | A/A                                              |                                                                        | 18:01:01/18:01:03/18:17N                                               | 40:01:01/40:01:02/40:55                                                |
| HG00324 (F)                                      | A/A                                              |                                                                        | 35:01:01/35:01:03/35:40N/35:42/35:57/35:94                             | 40:01:01/40:01:02/40:55                                                |
| HG00325 (M)                                      | A/A                                              |                                                                        | 35:01:01/35:01:03/35:40N/35:42/35:57/35:94                             | 35:01:01/35:01:03/35:40N/35:42/35:57/35:94                             |
| HG00326 (F)                                      | A/A                                              |                                                                        | 40:01:01/40:01:02/40:55                                                | 57:01:01                                                               |
| HG00327 (F)                                      | A/A                                              |                                                                        | 08:01:01/08:19N                                                        | 44:02:01:01/44:02:01:02S/44:19N/44:27/44:66                            |
| HG00328 (F)                                      | A/A                                              |                                                                        | 15:01:01:01/15:01:01:02N/15:01:06/15:01:07/15:102/15:104/15:140/15:146 | 27:05:02/27:05:04/27:13                                                |
| HG00329 (M)                                      | A/A                                              |                                                                        | 15:01:01:01/15:01:01:02N/15:01:06/15:01:07/15:102/15:104/15:140/15:146 | 51:01:01/51:01:05/51:01:07/51:11N/51:30/51:32/51:48/51:51              |
| HG00330 (F)                                      | A/A                                              |                                                                        | 15:01:01:01/15:01:01:02N/15:01:06/15:01:07/15:102/15:104/15:140/15:146 | 57:01:01                                                               |
| HG00331 (F)                                      | A/A                                              |                                                                        | 15:01:01:01/15:01:01:02N/15:01:06/15:01:07/15:102/15:104/15:140/15:146 | 35:01:01/35:01:03/35:40N/35:42/35:57/35:94                             |
| HG00332 (F)                                      | A/A                                              |                                                                        | 07:02:01/07:02:06/07:02:09/07:44/07:49N/07:58/07:59/07:61              | 35:01:01/35:01:03/35:40N/35:42/35:57/35:94                             |
| HG00334 (F)                                      | A/A                                              |                                                                        | 15:01:01:01/15:01:01:02N/15:01:06/15:01:07/15:102/15:104/15:140/15:146 | 39:01:01:01/39:01:01:02L/39:01:03/39:46                                |
| HG00335 (M)                                      | A/A                                              |                                                                        | 15:01:01:01/15:01:01:02N/15:01:06/15:01:07/15:102/15:104/15:140/15:146 | 27:05:02/27:05:04/27:13                                                |
| HG00336 (M)                                      | A/A                                              |                                                                        | 08:01:01/08:19N                                                        | 35:01:01/35:01:03/35:40N/35:42/35:57/35:94                             |
| HG00337 (F)                                      | A/A                                              |                                                                        | 07:02:01/07:02:06/07:02:09/07:44/07:49N/07:58/07:59/07:61              | 07:02:01/07:02:06/07:02:09/07:44/07:49N/07:58/07:59/07:61              |
| HG00338 (M)                                      | A/A                                              |                                                                        | 35:01:01/35:01:03/35:40N/35:42/35:57/35:94                             | 44:02:01:01/44:02:01:02S/44:19N/44:27/44:66                            |
| HG00339 (F)                                      | A/A                                              |                                                                        | 27:05:02/27:05:04/27:13                                                | 40:02:01/40:56/40:97                                                   |
| HG00341 (M)                                      | A/A                                              |                                                                        | 40:01:01/40:01:02/40:55                                                | 57:01:01                                                               |
| HG00342 (M)                                      | A/A                                              |                                                                        | 13:02:01/13:02:05                                                      | 44:02:01:01/44:02:01:02S/44:19N/44:27/44:66                            |
| HG00343 (F)                                      | A/A                                              |                                                                        | 35:01:01/35:01:03/35:40N/35:42/35:57/35:94                             | 39:01:01:01/39:01:01:02L/39:01:03/39:46                                |
| HG00344 (F)                                      | A/A                                              |                                                                        | 07:02:01/07:02:06/07:02:09/07:44/07:49N/07:58/07:59/07:61              | 07:02:01/07:02:06/07:02:09/07:44/07:49N/07:58/07:59/07:61              |
| HG00345 (M)                                      | A/A                                              |                                                                        | 08:01:01/08:19N                                                        | 35:01:01/35:01:03/35:40N/35:42/35:57/35:94                             |
| HG00346 (F)                                      | A/A                                              |                                                                        | 18:01:01/18:01:03/18:17N                                               | 51:01:01/51:01:05/51:01:07/51:11N/51:30/51:32/51:48/51:51              |
| HG00349 (F)                                      | A/A                                              |                                                                        | 08:01:01/08:19N                                                        | 27:05:02/27:05:04/27:13                                                |
| HG00350 (F)                                      | A/A                                              |                                                                        | 15:01:01:01/15:01:01:02N/15:01:06/15:01:07/15:102/15:104/15:140/15:146 | 15:01:01:01/15:01:01:02N/15:01:06/15:01:07/15:102/15:104/15:140/15:146 |
| HG00351 (M)                                      | A/A                                              |                                                                        | 07:02:01/07:02:06/07:02:09/07:44/07:49N/07:58/07:59/07:61              | 38:01:01                                                               |
| HG00353 (F)                                      | A/A                                              |                                                                        | 18:01:01/18:01:03/18:17N                                               | 44:02:01:01/44:02:01:02S/44:19N/44:27/44:66                            |
| HG00355 (F)                                      | A/A                                              |                                                                        | 44:03:01/44:03:03/44:03:04                                             | 47:01:01:01/47:01:01:02                                                |
| HG00356 (F)                                      | A/A                                              |                                                                        | 08:01:01/08:19N                                                        | 40:01:01/40:01:02/40:55                                                |
| HG00357 (F)                                      | A/A                                              | 08:01:01/08:19N                                                        | 57:01:01                                                               |                                                                        |
| HG00358 (M)                                      | A/A                                              | 27:05:02/27:05:04/27:13                                                | 47:01:01:01/47:01:01:02                                                |                                                                        |
| HG00360 (M)                                      | A/A                                              | 39:01:01:01/39:01:01:02L/39:01:03/39:46                                | 44:02:01:01/44:02:01:02S/44:19N/44:27/44:66                            |                                                                        |
| HG00361 (F)                                      | A/A                                              | 07:02:01/07:02:06/07:02:09/07:44/07:49N/07:58/07:59/07:61              | 35:01:01/35:01:03/35:40N/35:42/35:57/35:94                             |                                                                        |
| HG00362 (F)                                      | A/A                                              | 27:05:02/27:05:04/27:13                                                | 44:02:01:01/44:02:01:02S/44:19N/44:27/44:66                            |                                                                        |
| HG00364 (F)                                      | A/A                                              | 35:01:01/35:01:03/35:40N/35:42/35:57/35:94                             | 67:01:02                                                               |                                                                        |
| HG00365 (F)                                      | A/A                                              | 44:02:01:01/44:02:01:02S/44:19N/44:27/44:66                            | 56:01/56:24                                                            |                                                                        |
| HG00366 (M)                                      | A/A                                              | 07:02:01/07:02:06/07:02:09/07:44/07:49N/07:58/07:59/07:61              | 15:01:01:01/15:01:01:02N/15:01:06/15:01:07/15:102/15:104/15:140/15:146 |                                                                        |
| HG00367 (F)                                      | A/A                                              | 35:01:01/35:01:03/35:40N/35:42/35:57/35:94                             | 37:01:01                                                               |                                                                        |
| HG00368 (F)                                      | A/A                                              | 13:02:01/13:02:05                                                      | 56:01/56:24                                                            |                                                                        |
| HG00369 (M)                                      | A/A                                              | 27:05:02/27:05:04/27:13                                                | 44:02:01:01/44:02:01:02S/44:19N/44:27/44:66                            |                                                                        |
| HG00371 (M)                                      | A/A                                              | 35:01:01/35:01:03/35:40N/35:42/35:57/35:94                             | 40:01:01/40:01:02/40:55                                                |                                                                        |
| HG00372 (M)                                      | A/A                                              | 27:05:02/27:05:04/27:13                                                | 40:01:01/40:01:02/40:55                                                |                                                                        |
| HG00373 (F)                                      | A/A                                              | 15:01:01:01/15:01:01:02N/15:01:06/15:01:07/15:102/15:104/15:140/15:146 | 56:01/56:24                                                            |                                                                        |
| HG00375 (M)                                      | A/A                                              | 13:02:01/13:02:05                                                      | 40:01:01/40:01:02/40:55                                                |                                                                        |
| HG00376 (F)                                      | A/A                                              | 40:01:01/40:01:02/40:55                                                | 51:01:01/51:01:05/51:01:07/51:11N/51:30/51:32/51:48/51:51              |                                                                        |

| Individual (1000 Genomes Project Phase 3 Naming) | rs144012689 Genotype (minus strand;1000 Genomes) | Population                                                             | HLA-B Allele 1 (from NCBI dbMHC portal)                                | HLA-B Allele 2 (from NCBI dbMHC portal)                   |
|--------------------------------------------------|--------------------------------------------------|------------------------------------------------------------------------|------------------------------------------------------------------------|-----------------------------------------------------------|
| HG00378 (F)                                      | A/A                                              |                                                                        | 35:01:01/35:01:03/35:40N/35:42/35:57/35:94                             | 40:01:01/40:01:02/40:55                                   |
| HG00379 (F)                                      | A/A                                              |                                                                        | 07:02:01/07:02:06/07:02:09/07:44/07:49N/07:58/07:59/07:61              | 44:02:01:01/44:02:01:02S/44:19N/44:27/44:66               |
| HG00380 (F)                                      | A/A                                              |                                                                        | 07:02:01/07:02:06/07:02:09/07:44/07:49N/07:58/07:59/07:61              | 08:01:01/08:19N                                           |
| HG00381 (F)                                      | A/A                                              |                                                                        | 15:01:01:01/15:01:01:02N/15:01:06/15:01:07/15:102/15:104/15:140/15:146 | 39:01:01:01/39:01:01:02L/39:01:03/39:46                   |
| HG00382 (M)                                      | A/A                                              |                                                                        | 07:02:01/07:02:06/07:02:09/07:44/07:49N/07:58/07:59/07:61              | 44:02:01:01/44:02:01:02S/44:19N/44:27/44:66               |
| HG00383 (F)                                      | A/A                                              |                                                                        | 18:01:01/18:01:03/18:17N                                               | 27:05:02/27:05:04/27:13                                   |
| HG00384 (F)                                      | A/A                                              |                                                                        | 35:01:01/35:01:03/35:40N/35:42/35:57/35:94                             | 40:02:01/40:56/40:97                                      |
| HG00096 (M)                                      | A/A                                              | nes - British from England and Scotland, UK                            | 08:01:01/08:19N                                                        | 44:03:01/44:03:03/44:03:04                                |
| HG00097 (F)                                      | A/A                                              |                                                                        | 07:02:01/07:02:06/07:02:09/07:44/07:49N/07:58/07:59/07:61              | 07:02:01/07:02:06/07:02:09/07:44/07:49N/07:58/07:59/07:61 |
| HG00099 (F)                                      | A/A                                              |                                                                        | 08:01:01/08:19N                                                        | 44:02:01:01/44:02:01:02S/44:19N/44:27/44:66               |
| HG00100 (F)                                      | A/A                                              |                                                                        | 08:01:01/08:19N                                                        | 57:01:01                                                  |
| HG00101 (M)                                      | A/A                                              |                                                                        | 27:05:02/27:05:04/27:13                                                | 57:01:01                                                  |
| HG00102 (F)                                      | A/A                                              |                                                                        | 07:02:01/07:02:06/07:02:09/07:44/07:49N/07:58/07:59/07:61              | 08:01:01/08:19N                                           |
| HG00103 (M)                                      | A/A                                              |                                                                        | 35:01:01/35:01:03/35:40N/35:42/35:57/35:94                             | 40:01:01/40:01:02/40:55                                   |
| HG00105 (M)                                      | A/A                                              |                                                                        | 07:02:01/07:02:06/07:02:09/07:44/07:49N/07:58/07:59/07:61              | 44:03:01/44:03:03/44:03:04                                |
| HG00106 (F)                                      | A/A                                              |                                                                        | 08:01:01/08:19N                                                        | 35:03:01/35:70                                            |
| HG00107 (M)                                      | A/A                                              |                                                                        | 07:02:01/07:02:06/07:02:09/07:44/07:49N/07:58/07:59/07:61              | 40:01:01/40:01:02/40:55                                   |
| HG00108 (M)                                      | A/A                                              |                                                                        | 35:02:01                                                               | 40:01:01/40:01:02/40:55                                   |
| HG00109 (M)                                      | A/A                                              |                                                                        | 08:01:01/08:19N                                                        | 44:02:01:01/44:02:01:02S/44:19N/44:27/44:66               |
| HG00110 (F)                                      | A/A                                              |                                                                        | 44:02:01:01/44:02:01:02S/44:19N/44:27/44:66                            | 55:01:01/55:01:03                                         |
| HG00111 (F)                                      | A/A                                              |                                                                        | 27:05:02/27:05:04/27:13                                                | 57:01:01                                                  |
| HG00112 (M)                                      | A/A                                              |                                                                        | 14:02:01                                                               | 51:01:01/51:01:05/51:01:07/51:11N/51:30/51:32/51:48/51:51 |
| HG00113 (M)                                      | A/A                                              |                                                                        | 07:02:01/07:02:06/07:02:09/07:44/07:49N/07:58/07:59/07:61              | 44:03:01/44:03:03/44:03:04                                |
| HG00114 (M)                                      | A/A                                              |                                                                        | 07:02:01/07:02:06/07:02:09/07:44/07:49N/07:58/07:59/07:61              | 08:01:01/08:19N                                           |
| HG00115 (M)                                      | A/A                                              |                                                                        | 27:05:02/27:05:04/27:13                                                | 27:05:02/27:05:04/27:13                                   |
| HG00116 (M)                                      | A/A                                              |                                                                        | 07:02:01/07:02:06/07:02:09/07:44/07:49N/07:58/07:59/07:61              | 14:02:01                                                  |
| HG00117 (M)                                      | A/A                                              |                                                                        | 08:01:01/08:19N                                                        | 55:01:01/55:01:03                                         |
| HG00118 (F)                                      | A/A                                              |                                                                        | 07:02:01/07:02:06/07:02:09/07:44/07:49N/07:58/07:59/07:61              | 40:01:01/40:01:02/40:55                                   |
| HG00119 (M)                                      | A/A                                              |                                                                        | 35:03:01/35:70                                                         | 38:01:01                                                  |
| HG00120 (F)                                      | A/A                                              |                                                                        | 08:01:01/08:19N                                                        | 27:05:02/27:05:04/27:13                                   |
| HG00121 (F)                                      | A/A                                              |                                                                        | 07:02:01/07:02:06/07:02:09/07:44/07:49N/07:58/07:59/07:61              | 40:01:01/40:01:02/40:55                                   |
| HG00122 (F)                                      | A/A                                              |                                                                        | 14:01                                                                  | 57:01:01                                                  |
| HG00123 (F)                                      | A/A                                              |                                                                        | 44:03:01/44:03:03/44:03:04                                             | 57:01:01                                                  |
| HG00125 (F)                                      | A/A                                              |                                                                        | 14:02:01                                                               | 44:02:01:01/44:02:01:02S/44:19N/44:27/44:66               |
| HG00126 (M)                                      | A/A                                              |                                                                        | 35:03:01/35:70                                                         | 44:03:01/44:03:03/44:03:04                                |
| HG00127 (F)                                      | A/A                                              |                                                                        | 38:01:01                                                               | 45:01/45:07                                               |
| HG00128 (F)                                      | A/A                                              |                                                                        | 14:02:01                                                               | 27:05:02/27:05:04/27:13                                   |
| HG00129 (M)                                      | A/A                                              |                                                                        | 13:02:01/13:02:05                                                      | 35:01:01/35:01:03/35:40N/35:42/35:57/35:94                |
| HG00130 (F)                                      | A/A                                              |                                                                        | 15:03:01/15:103                                                        | 44:03:01/44:03:03/44:03:04                                |
| HG00131 (M)                                      | A/A                                              | 37:01:01                                                               | 57:01:01                                                               |                                                           |
| HG00132 (F)                                      | A/A                                              | 35:03:01/35:70                                                         | 44:02:01:01/44:02:01:02S/44:19N/44:27/44:66                            |                                                           |
| HG00133 (F)                                      | A/A                                              | 44:02:01:01/44:02:01:02S/44:19N/44:27/44:66                            | 53:01:01                                                               |                                                           |
| HG00136 (M)                                      | A/A                                              | 44:02:01:01/44:02:01:02S/44:19N/44:27/44:66                            | 51:01:01/51:01:05/51:01:07/51:11N/51:30/51:32/51:48/51:51              |                                                           |
| HG00137 (F)                                      | A/A                                              | 08:01:01/08:19N                                                        | 44:02:01:01/44:02:01:02S/44:19N/44:27/44:66                            |                                                           |
| HG00138 (M)                                      | A/A                                              | 35:01:01/35:01:03/35:40N/35:42/35:57/35:94                             | 51:01:01/51:01:05/51:01:07/51:11N/51:30/51:32/51:48/51:51              |                                                           |
| HG00139 (M)                                      | A/A                                              | 44:03:01/44:03:03/44:03:04                                             | 44:03:01/44:03:03/44:03:04                                             |                                                           |
| HG00140 (M)                                      | A/A                                              | 40:01:01/40:01:02/40:55                                                | 57:01:01                                                               |                                                           |
| HG00141 (M)                                      | A/A                                              | 15:01:01:01/15:01:01:02N/15:01:06/15:01:07/15:102/15:104/15:140/15:146 | 35:01:01/35:01:03/35:40N/35:42/35:57/35:94                             |                                                           |
| HG00142 (M)                                      | A/A                                              | 45:01/45:07                                                            | 57:01:01                                                               |                                                           |
| HG00143 (M)                                      | A/A                                              | 07:02:01/07:02:06/07:02:09/07:44/07:49N/07:58/07:59/07:61              | 57:01:01                                                               |                                                           |
| HG00145 (M)                                      | A/A                                              | 07:02:01/07:02:06/07:02:09/07:44/07:49N/07:58/07:59/07:61              | 40:01:01/40:01:02/40:55                                                |                                                           |
| HG00146 (F)                                      | A/A                                              | 08:01:01/08:19N                                                        | 35:01:01/35:01:03/35:40N/35:42/35:57/35:94                             |                                                           |
| HG00148 (M)                                      | A/A                                              | 40:01:01/40:01:02/40:55                                                | 44:02:01:01/44:02:01:02S/44:19N/44:27/44:66                            |                                                           |
| HG00149 (M)                                      | A/A                                              | 13:02:01/13:02:05                                                      | 44:03:01/44:03:03/44:03:04                                             |                                                           |
| HG00150 (F)                                      | A/A                                              | 27:05:02/27:05:04/27:13                                                | 51:01:01/51:01:05/51:01:07/51:11N/51:30/51:32/51:48/51:51              |                                                           |
| HG00151 (M)                                      | A/A                                              | 08:01:01/08:19N                                                        | 55:01:01/55:01:03                                                      |                                                           |

| Individual (1000 Genomes Project Phase 3 Naming) | rs144012689 Genotype (minus strand;1000 Genomes) | 1000 Genomes Population                                   | HLA-B Allele 1 (from NCBI dbMHC portal)                                | HLA-B Allele 2 (from NCBI dbMHC portal)                                |
|--------------------------------------------------|--------------------------------------------------|-----------------------------------------------------------|------------------------------------------------------------------------|------------------------------------------------------------------------|
| HG00154 (F)                                      | A/A                                              | 1000 Genomes Population                                   | 35:01:01/35:01:03/35:40N/35:42/35:57/35:94                             | 39:01:01:01/39:01:01:02L/39:01:03/39:46                                |
| HG00155 (M)                                      | A/A                                              |                                                           | 14:01                                                                  | 57:01:01                                                               |
| HG00157 (M)                                      | A/A                                              |                                                           | 07:02:01/07:02:06/07:02:09/07:44/07:49N/07:58/07:59/07:61              | 45:01/45:07                                                            |
| HG00158 (F)                                      | A/A                                              |                                                           | 07:02:01/07:02:06/07:02:09/07:44/07:49N/07:58/07:59/07:61              | 56:01/56:24                                                            |
| HG00159 (M)                                      | A/A                                              |                                                           | 07:02:01/07:02:06/07:02:09/07:44/07:49N/07:58/07:59/07:61              | 55:01:01/55:01:03                                                      |
| HG00160 (M)                                      | A/A                                              |                                                           | 13:02:01/13:02:05                                                      | 39:06:02                                                               |
| HG00231 (F)                                      | A/A                                              |                                                           | 44:02:01:01/44:02:01:02S/44:19N/44:27/44:66                            | 51:01:01/51:01:05/51:01:07/51:11N/51:30/51:32/51:48/51:51              |
| HG00232 (F)                                      | A/A                                              |                                                           | 07:02:01/07:02:06/07:02:09/07:44/07:49N/07:58/07:59/07:61              | 27:05:02/27:05:04/27:13                                                |
| HG00233 (F)                                      | A/A                                              |                                                           | 35:01:01/35:01:03/35:40N/35:42/35:57/35:94                             | 44:02:01:01/44:02:01:02S/44:19N/44:27/44:66                            |
| HG00234 (M)                                      | A/A                                              |                                                           | 18:01:01/18:01:03/18:17N                                               | 44:02:01:01/44:02:01:02S/44:19N/44:27/44:66                            |
| HG00235 (F)                                      | A/A                                              |                                                           | 07:02:01/07:02:06/07:02:09/07:44/07:49N/07:58/07:59/07:61              | 44:02:01:01/44:02:01:02S/44:19N/44:27/44:66                            |
| HG00236 (F)                                      | A/A                                              |                                                           | 07:02:01/07:02:06/07:02:09/07:44/07:49N/07:58/07:59/07:61              | 39:06:02                                                               |
| HG00237 (F)                                      | A/A                                              |                                                           | 35:01:01/35:01:03/35:40N/35:42/35:57/35:94                             | 39:06:02                                                               |
| HG00238 (F)                                      | A/A                                              |                                                           | 51:01:01/51:01:05/51:01:07/51:11N/51:30/51:32/51:48/51:51              | 56:01/56:24                                                            |
| HG00239 (F)                                      | A/A                                              |                                                           | 37:01:01                                                               | 44:02:01:01/44:02:01:02S/44:19N/44:27/44:66                            |
| HG00240 (F)                                      | A/A                                              |                                                           | 51:01:01/51:01:05/51:01:07/51:11N/51:30/51:32/51:48/51:51              | 56:01/56:24                                                            |
| HG00242 (M)                                      | A/A                                              |                                                           | 27:05:02/27:05:04/27:13                                                | 27:05:02/27:05:04/27:13                                                |
| HG00243 (M)                                      | A/A                                              |                                                           | 44:03:01/44:03:03/44:03:04                                             | 44:02:01:01/44:02:01:02S/44:19N/44:27/44:66                            |
| HG00244 (M)                                      | A/A                                              |                                                           | 15:01:01:01/15:01:01:02N/15:01:06/15:01:07/15:102/15:104/15:140/15:146 | 58:01:01/58:11                                                         |
| HG00245 (F)                                      | A/A                                              |                                                           | 40:01:01/40:01:02/40:55                                                | 40:01:01/40:01:02/40:55                                                |
| HG00246 (M)                                      | A/A                                              |                                                           | 27:05:02/27:05:04/27:13                                                | 51:01:01/51:01:05/51:01:07/51:11N/51:30/51:32/51:48/51:51              |
| HG00250 (F)                                      | A/A                                              |                                                           | 40:01:01/40:01:02/40:55                                                | 57:01:01                                                               |
| HG00251 (M)                                      | A/A                                              |                                                           | 08:01:01/08:19N                                                        | 39:01:01:01/39:01:01:02L/39:01:03/39:46                                |
| HG00252 (M)                                      | A/A                                              |                                                           | 40:02:01/40:56/40:97                                                   | 44:03:01/44:03:03/44:03:04                                             |
| HG00253 (F)                                      | A/A                                              |                                                           | 07:02:01/07:02:06/07:02:09/07:44/07:49N/07:58/07:59/07:61              | 58:01:01/58:11                                                         |
| HG00254 (F)                                      | A/A                                              |                                                           | 14:02:01                                                               | 14:02:01                                                               |
| HG00255 (F)                                      | A/A                                              |                                                           | 39:01:01:01/39:01:01:02L/39:01:03/39:46                                | 44:03:01/44:03:03/44:03:04                                             |
| HG00256 (M)                                      | A/A                                              |                                                           | 14:01                                                                  | 15:01:01:01/15:01:01:02N/15:01:06/15:01:07/15:102/15:104/15:140/15:146 |
| HG00257 (F)                                      | A/A                                              |                                                           | 08:01:01/08:19N                                                        | 40:02:01/40:56/40:97                                                   |
| HG00258 (F)                                      | A/A                                              |                                                           | 40:01:01/40:01:02/40:55                                                | 40:01:01/40:01:02/40:55                                                |
| HG00259 (F)                                      | A/A                                              |                                                           | 13:02:01/13:02:05                                                      | 40:01:01/40:01:02/40:55                                                |
| HG00260 (M)                                      | A/A                                              |                                                           | 18:01:01/18:01:03/18:17N                                               | 44:02:01:01/44:02:01:02S/44:19N/44:27/44:66                            |
| HG00261 (F)                                      | A/A                                              |                                                           | 55:01:01/55:01:03                                                      | 57:01:01                                                               |
| HG00262 (F)                                      | A/A                                              |                                                           | 44:03:01/44:03:03/44:03:04                                             | 44:02:01:01/44:02:01:02S/44:19N/44:27/44:66                            |
| HG00263 (F)                                      | A/A                                              |                                                           | 07:02:01/07:02:06/07:02:09/07:44/07:49N/07:58/07:59/07:61              | 41:01:00                                                               |
| HG00264 (M)                                      | A/A                                              |                                                           | 27:05:02/27:05:04/27:13                                                | 44:02:01:01/44:02:01:02S/44:19N/44:27/44:66                            |
| HG00265 (M)                                      | A/A                                              |                                                           | 08:01:01/08:19N                                                        | 08:01:01/08:19N                                                        |
| HG01334 (M)                                      | A/A                                              |                                                           | 44:02:01:01/44:02:01:02S/44:19N/44:27/44:66                            | 44:02:01:01/44:02:01:02S/44:19N/44:27/44:66                            |
| NA20502 (F)                                      | A/A                                              |                                                           | 07:02:01/07:02:06/07:02:09/07:44/07:49N/07:58/07:59/07:61              | 35:02:01                                                               |
| NA20504 (F)                                      | A/A                                              |                                                           | 55:01:01/55:01:03                                                      | 57:01:01                                                               |
| NA20505 (F)                                      | A/A                                              |                                                           | 35:03:01/35:70                                                         | 57:01:01                                                               |
| NA20506 (F)                                      | A/A                                              |                                                           | 08:01:01/08:19N                                                        | 18:01:01/18:01:03/18:17N                                               |
| NA20508 (F)                                      | A/A                                              |                                                           | 41:02:01                                                               | 57:01:01                                                               |
| NA20509 (M)                                      | A/A                                              |                                                           | 13:02:01/13:02:05                                                      | 51:01:01/51:01:05/51:01:07/51:11N/51:30/51:32/51:48/51:51              |
| NA20510 (M)                                      | A/A                                              |                                                           | 15:17:01:01/15:17:01:02                                                | 55:01:01/55:01:03                                                      |
| NA20512 (M)                                      | A/A                                              |                                                           | 27:05:02/27:05:04/27:13                                                | 51:01:01/51:01:05/51:01:07/51:11N/51:30/51:32/51:48/51:51              |
| NA20515 (M)                                      | A/A                                              |                                                           | 07:02:01/07:02:06/07:02:09/07:44/07:49N/07:58/07:59/07:61              | 18:01:01/18:01:03/18:17N                                               |
| NA20516 (M)                                      | A/A                                              |                                                           | 35:08:01                                                               | 44:02:01:01/44:02:01:02S/44:19N/44:27/44:66                            |
| NA20517 (F)                                      | A/A                                              | 35:02:01                                                  | 44:03:01/44:03:03/44:03:04                                             |                                                                        |
| NA20518 (M)                                      | A/A                                              | 07:02:01/07:02:06/07:02:09/07:44/07:49N/07:58/07:59/07:61 | 35:01:01/35:01:03/35:40N/35:42/35:57/35:94                             |                                                                        |
| NA20519 (M)                                      | A/A                                              | 13:02:01/13:02:05                                         | 51:01:01/51:01:05/51:01:07/51:11N/51:30/51:32/51:48/51:51              |                                                                        |
| NA20520 (M)                                      | A/A                                              | 18:01:01/18:01:03/18:17N                                  | 35:01:01/35:01:03/35:40N/35:42/35:57/35:94                             |                                                                        |
| NA20521 (M)                                      | A/A                                              | 14:01                                                     | 49:01:01                                                               |                                                                        |
| NA20522 (F)                                      | A/A                                              | 35:03:01/35:70                                            | 39:01:01:01/39:01:01:02L/39:01:03/39:46                                |                                                                        |
| NA20524 (M)                                      | A/A                                              | 44:03:01/44:03:03/44:03:04                                | 49:01:01                                                               |                                                                        |
| NA20525 (M)                                      | A/A                                              | 08:01:01/08:19N                                           | 51:01:01/51:01:05/51:01:07/51:11N/51:30/51:32/51:48/51:51              |                                                                        |

| Individual (1000 Genomes Project Phase 3 Naming) | rs144012689 Genotype (minus strand;1000 Genomes) | Population                                                | HLA-B Allele 1 (from NCBI dbMHC portal)                                | HLA-B Allele 2 (from NCBI dbMHC portal)                   |
|--------------------------------------------------|--------------------------------------------------|-----------------------------------------------------------|------------------------------------------------------------------------|-----------------------------------------------------------|
| NA20527 (M)                                      | A/A                                              | 1000 Genomes - Italian from Tuscany, Italy                | 07:02:01/07:02:06/07:02:09/07:44/07:49N/07:58/07:59/07:61              | 07:05:01/07:06                                            |
| NA20528 (M)                                      | A/A                                              |                                                           | 41:02:01                                                               | 44:03:01/44:03:03/44:03:04                                |
| NA20529 (F)                                      | A/A                                              |                                                           | 15:01:01/01:15:01:01:02N/15:01:06/15:01:07/15:102/15:104/15:140/15:146 | 55:01:01/55:01:03                                         |
| NA20530 (F)                                      | A/A                                              |                                                           | 07:02:01/07:02:06/07:02:09/07:44/07:49N/07:58/07:59/07:61              | 13:02:01/13:02:05                                         |
| NA20531 (F)                                      | A/A                                              |                                                           | 35:01:01/35:01:03/35:40N/35:42/35:57/35:94                             | 44:02:01:01/44:02:01:02S/44:19N/44:27/44:66               |
| NA20534 (M)                                      | A/A                                              |                                                           | 15:01:01/01:15:01:01:02N/15:01:06/15:01:07/15:102/15:104/15:140/15:146 | 27:05:02/27:05:04/27:13                                   |
| NA20535 (F)                                      | A/A                                              |                                                           | 07:02:01/07:02:06/07:02:09/07:44/07:49N/07:58/07:59/07:61              | 51:01:01/51:01:05/51:01:07/51:11N/51:30/51:32/51:48/51:51 |
| NA20538 (M)                                      | A/A                                              |                                                           | 44:02:01:01/44:02:01:02S/44:19N/44:27/44:66                            | 51:01:01/51:01:05/51:01:07/51:11N/51:30/51:32/51:48/51:51 |
| NA20539 (M)                                      | A/A                                              |                                                           | 07:02:01/07:02:06/07:02:09/07:44/07:49N/07:58/07:59/07:61              | 58:01:01/58:11                                            |
| NA20540 (F)                                      | A/A                                              |                                                           | 44:02:01:01/44:02:01:02S/44:19N/44:27/44:66                            | 51:01:01/51:01:05/51:01:07/51:11N/51:30/51:32/51:48/51:51 |
| NA20541 (F)                                      | A/A                                              |                                                           | 08:01:01/08:19N                                                        | 35:03:01/35:70                                            |
| NA20542 (F)                                      | A/A                                              |                                                           | 07:02:01/07:02:06/07:02:09/07:44/07:49N/07:58/07:59/07:61              | 14:02:01                                                  |
| NA20543 (M)                                      | A/A                                              |                                                           | 08:01:01/08:19N                                                        | 53:01:01                                                  |
| NA20544 (M)                                      | A/A                                              |                                                           | 14:02:01                                                               | 44:02:01:01/44:02:01:02S/44:19N/44:27/44:66               |
| NA20581 (M)                                      | A/A                                              |                                                           | 51:01:01/51:01:05/51:01:07/51:11N/51:30/51:32/51:48/51:51              | 57:01:01                                                  |
| NA20582 (F)                                      | A/A                                              |                                                           | 38:01:01                                                               | 55:01:01/55:01:03                                         |
| NA20585 (F)                                      | A/A                                              |                                                           | 07:02:01/07:02:06/07:02:09/07:44/07:49N/07:58/07:59/07:61              | 07:02:01/07:02:06/07:02:09/07:44/07:49N/07:58/07:59/07:61 |
| NA20586 (M)                                      | A/A                                              |                                                           | 08:01:01/08:19N                                                        | 18:01:01/18:01:03/18:17N                                  |
| NA20588 (M)                                      | A/A                                              |                                                           | 08:01:01/08:19N                                                        | 51:01:01/51:01:05/51:01:07/51:11N/51:30/51:32/51:48/51:51 |
| NA20589 (F)                                      | A/A                                              |                                                           | 18:01:01/18:01:03/18:17N                                               | 35:03:01/35:70                                            |
| NA20752 (M)                                      | A/A                                              |                                                           | 13:02:01/13:02:05                                                      | 51:01:01/51:01:05/51:01:07/51:11N/51:30/51:32/51:48/51:51 |
| NA20753 (F)                                      | A/A                                              |                                                           | 13:02:01/13:02:05                                                      | 35:02:01                                                  |
| NA20754 (M)                                      | A/A                                              |                                                           | 35:01:01/35:01:03/35:40N/35:42/35:57/35:94                             | 58:01:01/58:11                                            |
| NA20755 (M)                                      | A/A                                              |                                                           | 41:02:01                                                               | 44:03:01/44:03:03/44:03:04                                |
| NA20756 (F)                                      | A/A                                              |                                                           | 49:01:01                                                               | 51:01:01/51:01:05/51:01:07/51:11N/51:30/51:32/51:48/51:51 |
| NA20757 (F)                                      | A/A                                              |                                                           | 18:01:01/18:01:03/18:17N                                               | 38:01:01                                                  |
| NA20758 (M)                                      | A/A                                              |                                                           | 08:01:01/08:19N                                                        | 55:01:01/55:01:03                                         |
| NA20759 (M)                                      | A/A                                              |                                                           | 18:01:01/18:01:03/18:17N                                               | 44:03:01/44:03:03/44:03:04                                |
| NA20760 (F)                                      | A/A                                              |                                                           | 15:01:01/01:15:01:01:02N/15:01:06/15:01:07/15:102/15:104/15:140/15:146 | 57:01:01                                                  |
| NA20761 (F)                                      | A/A                                              |                                                           | 15:17:01:01/15:17:01:02                                                | 51:01:01/51:01:05/51:01:07/51:11N/51:30/51:32/51:48/51:51 |
| NA20765 (M)                                      | A/A                                              |                                                           | 55:01:01/55:01:03                                                      | 58:01:01/58:11                                            |
| NA20766 (F)                                      | A/A                                              |                                                           | 35:02:01                                                               | 51:01:01/51:01:05/51:01:07/51:11N/51:30/51:32/51:48/51:51 |
| NA20768 (F)                                      | A/A                                              |                                                           | 18:01:01/18:01:03/18:17N                                               | 44:03:01/44:03:03/44:03:04                                |
| NA20769 (F)                                      | A/A                                              |                                                           | 15:01:01/01:15:01:01:02N/15:01:06/15:01:07/15:102/15:104/15:140/15:146 | 58:01:01/58:11                                            |
| NA20770 (M)                                      | A/A                                              |                                                           | 50:01:00                                                               | 51:01:01/51:01:05/51:01:07/51:11N/51:30/51:32/51:48/51:51 |
| NA20771 (F)                                      | A/A                                              |                                                           | 13:02:01/13:02:05                                                      | 57:01:01                                                  |
| NA20772 (F)                                      | A/A                                              |                                                           | 40:01:01/40:01:02/40:55                                                | 51:01:01/51:01:05/51:01:07/51:11N/51:30/51:32/51:48/51:51 |
| NA20773 (F)                                      | A/A                                              |                                                           | 49:01:01                                                               | 49:01:01                                                  |
| NA20774 (F)                                      | A/A                                              |                                                           | 50:01:00                                                               | 51:01:01/51:01:05/51:01:07/51:11N/51:30/51:32/51:48/51:51 |
| NA20775 (F)                                      | A/A                                              |                                                           | 35:01:01/35:01:03/35:40N/35:42/35:57/35:94                             | 50:01:00                                                  |
| NA20778 (M)                                      | A/A                                              | 07:02:01/07:02:06/07:02:09/07:44/07:49N/07:58/07:59/07:61 | 35:03:01/35:70                                                         |                                                           |
| NA20783 (M)                                      | A/A                                              | 13:02:01/13:02:05                                         | 15:17:01:01/15:17:01:02                                                |                                                           |
| NA20785 (M)                                      | A/A                                              | 18:01:01/18:01:03/18:17N                                  | 52:01:01/52:07                                                         |                                                           |
| NA20786 (F)                                      | A/A                                              | 51:01:01/51:01:05/51:01:07/51:11N/51:30/51:32/51:48/51:51 | 51:01:01/51:01:05/51:01:07/51:11N/51:30/51:32/51:48/51:51              |                                                           |
| NA20787 (M)                                      | A/A                                              | 38:01:01                                                  | 39:06:02                                                               |                                                           |
| NA20790 (F)                                      | A/A                                              | 07:02:01/07:02:06/07:02:09/07:44/07:49N/07:58/07:59/07:61 | 37:01:01                                                               |                                                           |
| NA20792 (M)                                      | A/A                                              | 15:09                                                     | 35:01:01/35:01:03/35:40N/35:42/35:57/35:94                             |                                                           |
| NA20795 (F)                                      | A/A                                              | 18:01:01/18:01:03/18:17N                                  | 39:06:02                                                               |                                                           |
| NA20796 (M)                                      | A/A                                              | 07:02:01/07:02:06/07:02:09/07:44/07:49N/07:58/07:59/07:61 | 51:01:01/51:01:05/51:01:07/51:11N/51:30/51:32/51:48/51:51              |                                                           |
| NA20797 (F)                                      | A/A                                              | 07:05:01/07:06                                            | 14:02:01                                                               |                                                           |
| NA20798 (M)                                      | A/A                                              | 07:02:01/07:02:06/07:02:09/07:44/07:49N/07:58/07:59/07:61 | 08:01:01/08:19N                                                        |                                                           |
| NA20799 (F)                                      | A/A                                              | 15:18                                                     | 57:02:00                                                               |                                                           |
| NA20800 (F)                                      | A/A                                              | 37:01:01                                                  | 44:03:01/44:03:03/44:03:04                                             |                                                           |
| NA20801 (M)                                      | A/A                                              | 18:01:01/18:01:03/18:17N                                  | 44:02:01:01/44:02:01:02S/44:19N/44:27/44:66                            |                                                           |
| NA20802 (F)                                      | A/A                                              | 08:01:01/08:19N                                           | 40:01:01/40:01:02/40:55                                                |                                                           |
| NA20803 (M)                                      | A/A                                              | 44:03:01/44:03:03/44:03:04                                | 53:01:01                                                               |                                                           |

| Individual (1000 Genomes Project Phase 3 Naming) | rs144012689 Genotype (minus strand;1000 Genomes) | Population                                                             | HLA-B Allele 1 (from NCBI dbMHC portal)                                | HLA-B Allele 2 (from NCBI dbMHC portal)                   |
|--------------------------------------------------|--------------------------------------------------|------------------------------------------------------------------------|------------------------------------------------------------------------|-----------------------------------------------------------|
| NA20804 (F)                                      | A/A                                              | African                                                                | 35:02:01                                                               | 51:01:01/51:01:05/51:01:07/51:11N/51:30/51:32/51:48/51:51 |
| NA20805 (M)                                      | A/A                                              |                                                                        | 18:01:01/18:01:03/18:17N                                               | 44:02:01:01/44:02:01:02S/44:19N/44:27/44:66               |
| NA20806 (M)                                      | A/A                                              |                                                                        | 35:03:01/35:70                                                         | 51:01:01/51:01:05/51:01:07/51:11N/51:30/51:32/51:48/51:51 |
| NA20807 (F)                                      | A/A                                              |                                                                        | 07:02:01/07:02:06/07:02:09/07:44/07:49N/07:58/07:59/07:61              | 08:01:01/08:19N                                           |
| NA20808 (F)                                      | A/A                                              |                                                                        | 07:05:01/07:06                                                         | 51:01:01/51:01:05/51:01:07/51:11N/51:30/51:32/51:48/51:51 |
| NA20809 (M)                                      | A/A                                              |                                                                        | 07:02:01/07:02:06/07:02:09/07:44/07:49N/07:58/07:59/07:61              | 44:03:01/44:03:03/44:03:04                                |
| NA20810 (M)                                      | A/A                                              |                                                                        | 35:03:01/35:70                                                         | 39:06:02                                                  |
| NA20811 (M)                                      | A/A                                              |                                                                        | 35:08:01                                                               | 57:01:01                                                  |
| NA20812 (M)                                      | A/A                                              |                                                                        | 18:01:01/18:01:03/18:17N                                               | 41:01:00                                                  |
| NA20813 (F)                                      | A/A                                              |                                                                        | 07:02:01/07:02:06/07:02:09/07:44/07:49N/07:58/07:59/07:61              | 44:02:01:01/44:02:01:02S/44:19N/44:27/44:66               |
| NA20814 (M)                                      | A/A                                              |                                                                        | 35:01:01/35:01:03/35:40N/35:42/35:57/35:94                             | 44:02:01:01/44:02:01:02S/44:19N/44:27/44:66               |
| NA20815 (M)                                      | A/A                                              |                                                                        | 15:01:01:01/15:01:01:02N/15:01:06/15:01:07/15:102/15:104/15:140/15:146 | 44:02:01:01/44:02:01:02S/44:19N/44:27/44:66               |
| NA20818 (F)                                      | A/A                                              |                                                                        | 35:02:01                                                               | 35:01:01/35:01:03/35:40N/35:42/35:57/35:94                |
| NA20819 (F)                                      | A/A                                              |                                                                        | 35:01:01/35:01:03/35:40N/35:42/35:57/35:94                             | 51:01:01/51:01:05/51:01:07/51:11N/51:30/51:32/51:48/51:51 |
| NA20826 (F)                                      | A/A                                              |                                                                        | 13:02:01/13:02:05                                                      | 38:01:01                                                  |
| NA20828 (F)                                      | A/A                                              |                                                                        | 49:01:01                                                               | 51:01:01/51:01:05/51:01:07/51:11N/51:30/51:32/51:48/51:51 |
| NA18526 (F)                                      | A/A                                              |                                                                        | 40:01:00                                                               | 58:01:00                                                  |
| NA18530 (M)                                      | A/A                                              |                                                                        | 44:03:01/44:03:03/44:03:04                                             | 48:01:01/48:09                                            |
| NA18532 (F)                                      | A/A                                              |                                                                        | 13:02:01/13:02:05                                                      | 15:18                                                     |
| NA18534 (M)                                      | A/A                                              |                                                                        | 15:01:01:01/15:01:01:02N/15:01:06/15:01:07/15:102/15:104/15:140/15:146 | 58:01:01/58:11                                            |
| NA18536 (M)                                      | A/A                                              |                                                                        | 48:01:01/48:09                                                         | 51:02:01                                                  |
| NA18537 (F)                                      | A/A                                              |                                                                        | 38:02:00                                                               | 46:01:00                                                  |
| NA18542 (F)                                      | A/A                                              |                                                                        | 46:01:00                                                               | 58:01:00                                                  |
| NA18543 (M)                                      | A/A                                              |                                                                        | 13:01:01                                                               | 46:01:01/46:15N                                           |
| NA18544 (M)                                      | A/A                                              |                                                                        | 07:02:01/07:02:06/07:02:09/07:44/07:49N/07:58/07:59/07:61              | 52:01:01/52:07                                            |
| NA18545 (F)                                      | A/A                                              |                                                                        | 40:01:00                                                               | 40:01:00                                                  |
| NA18546 (M)                                      | A/A                                              |                                                                        | 40:01:01/40:01:02/40:55                                                | 58:01:01/58:11                                            |
| NA18547 (F)                                      | A/T                                              |                                                                        | 15:02                                                                  | 38:01:00                                                  |
| NA18548 (M)                                      | A/A                                              |                                                                        | 40:02:01/40:56/40:97                                                   | 51:01:01/51:01:05/51:01:07/51:11N/51:30/51:32/51:48/51:51 |
| NA18549 (M)                                      | A/A                                              |                                                                        | 55:02:01                                                               | 58:01:01/58:11                                            |
| NA18550 (F)                                      | A/A                                              |                                                                        | 13:01                                                                  | 46:01:00                                                  |
| NA18552 (F)                                      | A/A                                              |                                                                        | 1.668055556                                                            | 1.917361111                                               |
| NA18555 (F)                                      | A/A                                              |                                                                        | 7:05                                                                   | 54:01:00                                                  |
| NA18557 (M)                                      | A/A                                              |                                                                        | 35:03:01/35:70                                                         | 44:02:01:01/44:02:01:02S/44:19N/44:27/44:66               |
| NA18558 (M)                                      | A/A                                              | 48:01:00                                                               | 67:01:00                                                               |                                                           |
| NA18559 (M)                                      | T/A                                              | 15:02                                                                  | 37:01:01                                                               |                                                           |
| NA18561 (M)                                      | A/A                                              | 39:01:00                                                               | 59:01:00                                                               |                                                           |
| NA18562 (M)                                      | A/A                                              | 51:01:00                                                               | 52:01:00                                                               |                                                           |
| NA18563 (M)                                      | A/A                                              | 48:01:00                                                               | 51:01:00                                                               |                                                           |
| NA18564 (F)                                      | A/A                                              | 13:01                                                                  | 13:02:01/13:02:05                                                      |                                                           |
| NA18566 (F)                                      | A/A                                              | 35:01:00                                                               | 8:01                                                                   |                                                           |
| NA18570 (F)                                      | A/A                                              | 15:01                                                                  | 15:11                                                                  |                                                           |
| NA18571 (F)                                      | A/A                                              | 40:01:00                                                               | 51:01:00                                                               |                                                           |
| NA18572 (M)                                      | A/A                                              | 15:01                                                                  | 54:01:00                                                               |                                                           |
| NA18573 (F)                                      | A/A                                              | 46:01:00                                                               | 54:01:00                                                               |                                                           |
| NA18577 (F)                                      | A/A                                              | 15:01:01:01/15:01:01:02N/15:01:06/15:01:07/15:102/15:104/15:140/15:146 | 40:01:01/40:01:02/40:55                                                |                                                           |
| NA18579 (F)                                      | A/A                                              | 52:01:01/52:07                                                         | 81:01/81:02/81:03                                                      |                                                           |
| NA18582 (F)                                      | A/A                                              | 40:01:00                                                               | 52:01:00                                                               |                                                           |
| NA18592 (F)                                      | A/A                                              | 15:18                                                                  | 40:06:00                                                               |                                                           |
| NA18593 (F)                                      | A/A                                              | 37:01:00                                                               | 40:01:00                                                               |                                                           |
| NA18595 (F)                                      | A/A                                              | 40:01:01/40:01:02/40:55                                                | 44:02:01:01/44:02:01:02S/44:19N/44:27/44:66                            |                                                           |
| NA18596 (F)                                      | A/A                                              | 35:01:01/35:01:03/35:40N/35:42/35:57/35:94                             | 46:01:01/46:15N                                                        |                                                           |
| NA18597 (F)                                      | A/A                                              | 35:01:01/35:01:03/35:40N/35:42/35:57/35:94                             | 51:01:01/51:01:05/51:01:07/51:11N/51:30/51:32/51:48/51:51              |                                                           |
| NA18599 (F)                                      | A/A                                              | 13:02:01/13:02:05                                                      | 54:01/54:17                                                            |                                                           |
| NA18602 (F)                                      | A/A                                              | 15:07                                                                  | 54:01/54:17                                                            |                                                           |
| NA18603 (M)                                      | A/A                                              | 13:02:01/13:02:05                                                      | 40:06:00                                                               |                                                           |

| Individual (1000 Genomes Project Phase 3 Naming) | rs144012689 Genotype (minus strand;1000 Genomes) | Population                                                | HLA-B Allele 1 (from NCBI dbMHC portal)                                | HLA-B Allele 2 (from NCBI dbMHC portal)                   |
|--------------------------------------------------|--------------------------------------------------|-----------------------------------------------------------|------------------------------------------------------------------------|-----------------------------------------------------------|
| NA18605 (M)                                      | A/A                                              | Han from Beijing, China + Japanese from Tokyo, Japan      | 15:01                                                                  | 38:02:00                                                  |
| NA18606 (M)                                      | A/A                                              |                                                           | 13:01:01                                                               | 46:01:01/46:15N                                           |
| NA18608 (M)                                      | A/A                                              |                                                           | 48:01:00                                                               | 51:01:00                                                  |
| NA18609 (M)                                      | A/A                                              |                                                           | 35:03:00                                                               | 38:02:00                                                  |
| NA18610 (F)                                      | A/A                                              |                                                           | 35:01:01/35:01:03/35:40N/35:42/35:57/35:94                             | 52:01:01/52:07                                            |
| NA18611 (M)                                      | A/A                                              |                                                           | 46:01:00                                                               | 51:01:00                                                  |
| NA18612 (M)                                      | A/A                                              |                                                           | 40:06:01:01/40:06:01:02                                                | 57:01:01                                                  |
| NA18613 (M)                                      | A/A                                              |                                                           | 13:01:01                                                               | 51:01:01/51:01:05/51:01:07/51:11N/51:30/51:32/51:48/51:51 |
| NA18614 (F)                                      | A/A                                              |                                                           | 46:01:01/46:15N                                                        | 58:01:01/58:11                                            |
| NA18615 (F)                                      | A/A                                              |                                                           | 13:02:01/13:02:05                                                      | 46:01:01/46:15N                                           |
| NA18616 (F)                                      | A/A                                              |                                                           | 15:18                                                                  | 40:01:01/40:01:02/40:55                                   |
| NA18617 (F)                                      | A/A                                              |                                                           | 40:01:01/40:01:02/40:55                                                | 58:01:01/58:11                                            |
| NA18618 (F)                                      | A/A                                              |                                                           | 15:27:01                                                               | 40:01:01/40:01:02/40:55                                   |
| NA18619 (F)                                      | A/A                                              |                                                           | 40:01:01/40:01:02/40:55                                                | 58:01:01/58:11                                            |
| NA18620 (M)                                      | A/A                                              |                                                           | 40:01:00                                                               | 48:01:00                                                  |
| NA18621 (M)                                      | A/A                                              |                                                           | 15:01                                                                  | 15:18                                                     |
| NA18622 (M)                                      | A/A                                              |                                                           | 35:03:00                                                               | 51:01:00                                                  |
| NA18623 (M)                                      | A/A                                              |                                                           | 13:02:01/13:02:05                                                      | 40:01:00                                                  |
| NA18624 (M)                                      | A/A                                              |                                                           | 13:02:01/13:02:05                                                      | 52:01:00                                                  |
| NA18625 (F)                                      | A/A                                              |                                                           | 37:01:01                                                               | 46:01:01/46:15N                                           |
| NA18626 (F)                                      | A/A                                              |                                                           | 27:07:00                                                               | 50:01:00                                                  |
| NA18627 (F)                                      | A/A                                              |                                                           | 15:01:01:01/15:01:01:02N/15:01:06/15:01:07/15:102/15:104/15:140/15:146 | 51:01:01/51:01:05/51:01:07/51:11N/51:30/51:32/51:48/51:51 |
| NA18628 (F)                                      | A/A                                              |                                                           | 46:01:01/46:15N                                                        | 58:01:01/58:11                                            |
| NA18630 (F)                                      | A/T                                              |                                                           | 15:02                                                                  | 40:01:01/40:01:02/40:55                                   |
| NA18631 (F)                                      | A/A                                              |                                                           | 35:01:01/35:01:03/35:40N/35:42/35:57/35:94                             | 40:01:01/40:01:02/40:55                                   |
| NA18632 (M)                                      | A/A                                              |                                                           | 46:01:00                                                               | 58:01:00                                                  |
| NA18633 (M)                                      | A/A                                              |                                                           | 54:01:00                                                               | 54:01:00                                                  |
| NA18634 (F)                                      | A/A                                              |                                                           | 40:02:01/40:56/40:97                                                   | 46:01:01/46:15N                                           |
| NA18635 (M)                                      | A/A                                              |                                                           | 40:06:00                                                               | 51:01:00                                                  |
| NA18636 (M)                                      | A/A                                              |                                                           | 40:01:00                                                               | 46:01:00                                                  |
| NA18637 (M)                                      | A/A                                              |                                                           | 15:01                                                                  | 67:01:00                                                  |
| NA18638 (M)                                      | A/A                                              |                                                           | 40:01:01/40:01:02/40:55                                                | 58:01:01/58:11                                            |
| NA18639 (M)                                      | A/T                                              |                                                           | 15:02                                                                  | 54:01/54:17                                               |
| NA18640 (F)                                      | A/A                                              |                                                           | 46:01:01/46:15N                                                        | 46:01:01/46:15N                                           |
| NA18641 (F)                                      | A/A                                              |                                                           | 40:01:01/40:01:02/40:55                                                | 51:01:01/51:01:05/51:01:07/51:11N/51:30/51:32/51:48/51:51 |
| NA18642 (F)                                      | A/A                                              |                                                           | 07:02:01/07:02:06/07:02:09/07:44/07:49N/07:58/07:59/07:61              | 38:01:01                                                  |
| NA18643 (M)                                      | A/A                                              |                                                           | 40:06:01:01/40:06:01:02                                                | 46:01:01/46:15N                                           |
| NA18644 (F)                                      | A/A                                              |                                                           | 40:02:01/40:56/40:97                                                   | 58:01:01/58:11                                            |
| NA18647 (M)                                      | A/A                                              |                                                           | 13:02:01/13:02:05                                                      | 44:02:01:01/44:02:01:02S/44:19N/44:27/44:66               |
| NA18740 (M)                                      | A/A                                              |                                                           | 13:01:01                                                               | 40:01:01/40:01:02/40:55                                   |
| NA18745 (M)                                      | A/A                                              |                                                           | 38:02:01/38:18                                                         | 48:01:01/48:09                                            |
| NA18747 (M)                                      | A/A                                              |                                                           | 15:27:01                                                               | 35:03:01/35:70                                            |
| NA18748 (M)                                      | A/A                                              |                                                           | 07:02:01/07:02:06/07:02:09/07:44/07:49N/07:58/07:59/07:61              | 58:01:01/58:11                                            |
| NA18749 (M)                                      | A/A                                              |                                                           | 13:02:01/13:02:05                                                      | 44:03:02                                                  |
| NA18757 (M)                                      | A/A                                              |                                                           | 07:02:01/07:02:06/07:02:09/07:44/07:49N/07:58/07:59/07:61              | 55:02:01                                                  |
| NA18939 (F)                                      | A/A                                              |                                                           | 27:04:01                                                               | 67:01:01                                                  |
| NA18940 (M)                                      | A/A                                              |                                                           | 46:01:00                                                               | 52:01:00                                                  |
| NA18941 (F)                                      | A/A                                              |                                                           | 15:07                                                                  | 40:01:01/40:01:02/40:55                                   |
| NA18942 (F)                                      | A/A                                              | 35:01:00                                                  | 44:03:01/44:03:03/44:03:04                                             |                                                           |
| NA18943 (M)                                      | A/A                                              | 35:01:00                                                  | 46:01:00                                                               |                                                           |
| NA18944 (M)                                      | A/A                                              | 40:02:00                                                  | 51:01:00                                                               |                                                           |
| NA18945 (M)                                      | A/A                                              | 15:01                                                     | 44:03:01/44:03:03/44:03:04                                             |                                                           |
| NA18946 (F)                                      | A/A                                              | 07:02:01/07:02:06/07:02:09/07:44/07:49N/07:58/07:59/07:61 | 52:01:01/52:07                                                         |                                                           |
| NA18947 (F)                                      | A/A                                              | 52:01:00                                                  | 52:01:00                                                               |                                                           |
| NA18948 (M)                                      | A/A                                              | 7:02                                                      | 13:02:01/13:02:05                                                      |                                                           |
| NA18949 (F)                                      | A/A                                              | 07:02:01/07:02:06/07:02:09/07:44/07:49N/07:58/07:59/07:61 | 40:02:01/40:56/40:97                                                   |                                                           |

| Individual (1000 Genomes Project Phase 3 Naming) | rs144012689 Genotype (minus strand;1000 Genomes) | 1000 GenomPopulation                                      | HLA-B Allele 1 (from NCBI dbMHC portal)                                | HLA-B Allele 2 (from NCBI dbMHC portal)                   |
|--------------------------------------------------|--------------------------------------------------|-----------------------------------------------------------|------------------------------------------------------------------------|-----------------------------------------------------------|
| NA18951 (F)                                      | A/A                                              | 1000 GenomPopulation                                      | 40:01:00                                                               | 59:01:00                                                  |
| NA18952 (M)                                      | A/A                                              |                                                           | 7:02                                                                   | 51:01:00                                                  |
| NA18953 (M)                                      | A/A                                              |                                                           | 40:01:00                                                               | 40:02:00                                                  |
| NA18954 (F)                                      | A/A                                              |                                                           | 13:01:01                                                               | 52:01:01/52:07                                            |
| NA18956 (F)                                      | A/A                                              |                                                           | 15:01                                                                  | 40:02:00                                                  |
| NA18957 (F)                                      | A/A                                              |                                                           | 52:01:01/52:07                                                         | 52:01:01/52:07                                            |
| NA18959 (M)                                      | A/A                                              |                                                           | 52:01:00                                                               | 67:01:00                                                  |
| NA18960 (M)                                      | A/A                                              |                                                           | 40:06:00                                                               | 54:01:00                                                  |
| NA18961 (M)                                      | A/A                                              |                                                           | 51:01:00                                                               | 54:01:00                                                  |
| NA18962 (M)                                      | A/A                                              |                                                           | 07:02:01/07:02:06/07:02:09/07:44/07:49N/07:58/07:59/07:61              | 52:01:01/52:07                                            |
| NA18963 (F)                                      | A/A                                              |                                                           | 40:06:01:01/40:06:01:02                                                | 44:03:01/44:03:03/44:03:04                                |
| NA18964 (F)                                      | A/A                                              |                                                           | 35:01:00                                                               | 40:02:00                                                  |
| NA18965 (M)                                      | A/A                                              |                                                           | 40:06:00                                                               | 56:01:00                                                  |
| NA18966 (M)                                      | A/A                                              |                                                           | 15:01                                                                  | 35:01:00                                                  |
| NA18967 (M)                                      | A/A                                              |                                                           | 40:02:00                                                               | 51:01:00                                                  |
| NA18968 (F)                                      | A/A                                              |                                                           | 40:01:01/40:01:02/40:55                                                | 51:01:01/51:01:05/51:01:07/51:11N/51:30/51:32/51:48/51:51 |
| NA18969 (F)                                      | A/A                                              |                                                           | 48:01:00                                                               | 52:01:00                                                  |
| NA18970 (M)                                      | A/A                                              |                                                           | 15:18                                                                  | 54:01:00                                                  |
| NA18971 (M)                                      | A/A                                              |                                                           | 40:02:00                                                               | 40:02:00                                                  |
| NA18972 (F)                                      | A/A                                              |                                                           | 40:02:00                                                               | 59:01:00                                                  |
| NA18973 (F)                                      | A/A                                              |                                                           | 15:07                                                                  | 46:01:00                                                  |
| NA18974 (M)                                      | A/A                                              |                                                           | 39:01:00                                                               | 40:01:00                                                  |
| NA18975 (F)                                      | A/A                                              |                                                           | 7:02                                                                   | 15:01                                                     |
| NA18976 (F)                                      | A/A                                              |                                                           | 44:03:01/44:03:03/44:03:04                                             | 44:03:01/44:03:03/44:03:04                                |
| NA18977 (M)                                      | A/A                                              |                                                           | 35:01:01/35:01:03/35:40N/35:42/35:57/35:94                             | 55:02:01                                                  |
| NA18978 (F)                                      | A/A                                              |                                                           | 40:02:00                                                               | 44:02:00                                                  |
| NA18979 (F)                                      | A/A                                              |                                                           | 52:01:01/52:07                                                         | 55:02:01                                                  |
| NA18980 (F)                                      | A/A                                              |                                                           | 13:01                                                                  | 40:01:00                                                  |
| NA18981 (F)                                      | A/A                                              |                                                           | 51:01:00                                                               | 51:01:00                                                  |
| NA18987 (F)                                      | A/A                                              |                                                           | 40:06:00                                                               | 46:01:00                                                  |
| NA18990 (M)                                      | A/A                                              |                                                           | 40:02:00                                                               | 44:03:01/44:03:03/44:03:04                                |
| NA18991 (F)                                      | A/A                                              |                                                           | 40:02:00                                                               | 52:01:00                                                  |
| NA18992 (F)                                      | A/A                                              |                                                           | 44:03:01/44:03:03/44:03:04                                             | 52:01:00                                                  |
| NA18993 (F)                                      | A/A                                              |                                                           | 35:01:01/35:01:03/35:40N/35:42/35:57/35:94                             | 39:01:01/39:01:01:02L/39:01:03/39:46                      |
| NA18994 (M)                                      | A/A                                              |                                                           | 7:02                                                                   | 40:02:00                                                  |
| NA18995 (M)                                      | A/A                                              |                                                           | 15:07                                                                  | 44:03:01/44:03:03/44:03:04                                |
| NA18997 (F)                                      | A/A                                              |                                                           | 15:01:01:01/15:01:01:02N/15:01:06/15:01:07/15:102/15:104/15:140/15:146 | 39:01:01:01/39:01:01:02L/39:01:03/39:46                   |
| NA18998 (F)                                      | A/A                                              |                                                           | 52:01:00                                                               | 54:01:00                                                  |
| NA18999 (F)                                      | A/A                                              |                                                           | 40:06:00                                                               | 46:01:00                                                  |
| NA19000 (M)                                      | A/A                                              |                                                           | 54:01:00                                                               | 67:01:00                                                  |
| NA19001 (F)                                      | A/A                                              | 07:02:01/07:02:06/07:02:09/07:44/07:49N/07:58/07:59/07:61 | 52:01:01/52:07                                                         |                                                           |
| NA19002 (F)                                      | A/A                                              | 37:01:01                                                  | 44:03:01/44:03:03/44:03:04                                             |                                                           |
| NA19003 (F)                                      | A/A                                              | 39:01:00                                                  | 39:01:00                                                               |                                                           |
| NA19005 (M)                                      | A/A                                              | 58:01:00                                                  | 67:01:00                                                               |                                                           |
| NA19007 (M)                                      | A/A                                              | 35:01:00                                                  | 46:01:00                                                               |                                                           |
| NA19009 (M)                                      | A/A                                              | 40:01:01/40:01:02/40:55                                   | 52:01:01/52:07                                                         |                                                           |
| NA19010 (F)                                      | A/A                                              | 35:01:01/35:01:03/35:40N/35:42/35:57/35:94                | 35:01:01/35:01:03/35:40N/35:42/35:57/35:94                             |                                                           |
| NA19012 (M)                                      | A/A                                              | 35:01:01/35:01:03/35:40N/35:42/35:57/35:94                | 35:01:01/35:01:03/35:40N/35:42/35:57/35:94                             |                                                           |
| NA19054 (F)                                      | A/A                                              | 35:01:01/35:01:03/35:40N/35:42/35:57/35:94                | 44:03:01/44:03:03/44:03:04                                             |                                                           |
| NA19055 (M)                                      | A/A                                              | 07:02:01/07:02:06/07:02:09/07:44/07:49N/07:58/07:59/07:61 | 59:01:00                                                               |                                                           |
| NA19056 (M)                                      | A/A                                              | 40:06:01:01/40:06:01:02                                   | 40:02:01/40:56/40:97                                                   |                                                           |
| NA19057 (F)                                      | A/A                                              | 40:06:01:01/40:06:01:02                                   | 59:01:00                                                               |                                                           |
| NA19058 (M)                                      | A/A                                              | 39:02:01                                                  | 54:01/54:17                                                            |                                                           |
| NA19059 (F)                                      | A/A                                              | 46:01:01/46:15N                                           | 52:01:01/52:07                                                         |                                                           |
| NA19060 (M)                                      | A/A                                              | 40:02:01/40:56/40:97                                      | 51:01:01/51:01:05/51:01:07/51:11N/51:30/51:32/51:48/51:51              |                                                           |
| NA19062 (M)                                      | A/A                                              | 07:02:01/07:02:06/07:02:09/07:44/07:49N/07:58/07:59/07:61 | 44:03:01/44:03:03/44:03:04                                             |                                                           |

| Individual (1000 Genomes Project Phase 3 Naming) | rs144012689 Genotype (minus strand;1000 Genomes) | Population                                                             | HLA-B Allele 1 (from NCBI dbMHC portal)                                | HLA-B Allele 2 (from NCBI dbMHC portal)                                |                                            |
|--------------------------------------------------|--------------------------------------------------|------------------------------------------------------------------------|------------------------------------------------------------------------|------------------------------------------------------------------------|--------------------------------------------|
| NA19063 (M)                                      | A/A                                              | NA                                                                     | 15:18                                                                  | 15:01:01:01/15:01:01:02N/15:01:06:15:01:07:15:102/15:104/15:140/15:146 |                                            |
| NA19064 (F)                                      | A/A                                              |                                                                        | 15:18                                                                  | 46:01:01/46:15N                                                        |                                            |
| NA19065 (F)                                      | A/A                                              |                                                                        | 39:01:01:01/39:01:01:02L/39:01:03/39:46                                | 51:01:01/51:01:05/51:01:07/51:11N/51:30/51:32/51:48/51:51              |                                            |
| NA19066 (M)                                      | A/A                                              |                                                                        | 51:01:01/51:01:05/51:01:07/51:11N/51:30/51:32/51:48/51:51              | 52:01:01/52:07                                                         |                                            |
| NA19067 (M)                                      | A/A                                              |                                                                        | 15:18                                                                  | 54:01/54:17                                                            |                                            |
| NA19068 (M)                                      | A/A                                              |                                                                        | 40:02:01/40:56/40:97                                                   | 51:01:01/51:01:05/51:01:07/51:11N/51:30/51:32/51:48/51:51              |                                            |
| NA19070 (M)                                      | A/A                                              |                                                                        | 46:01:01/46:15N                                                        | 52:01:01/52:07                                                         |                                            |
| NA19072 (M)                                      | A/A                                              |                                                                        | 46:01:01/46:15N                                                        | 58:01:01/58:11                                                         |                                            |
| NA19074 (F)                                      | A/A                                              |                                                                        | 40:02:01/40:56/40:97                                                   | 52:01:01/52:07                                                         |                                            |
| NA19075 (M)                                      | A/A                                              |                                                                        | 15:01:01:01/15:01:01:02N/15:01:06:15:01:07:15:102/15:104/15:140/15:146 | 56:01/56:24                                                            |                                            |
| NA19076 (M)                                      | A/A                                              |                                                                        | 40:02:01/40:56/40:97                                                   | 40:02:01/40:56/40:97                                                   |                                            |
| NA19077 (F)                                      | A/A                                              |                                                                        | 37:01:01                                                               | 51:01:01/51:01:05/51:01:07/51:11N/51:30/51:32/51:48/51:51              |                                            |
| NA19078 (F)                                      | A/A                                              |                                                                        | 40:06:01:01/40:06:01:02                                                | 54:01/54:17                                                            |                                            |
| NA19079 (M)                                      | A/A                                              |                                                                        | 44:03:01/44:03:03/44:03:04                                             | 48:01:01/48:09                                                         |                                            |
| NA19080 (F)                                      | A/A                                              |                                                                        | 48:01:01/48:09                                                         | 58:01:01/58:11                                                         |                                            |
| NA19081 (F)                                      | A/A                                              |                                                                        | 35:01:01/35:01:03/35:40N/35:42/35:57/35:94                             | 52:01:01/52:07                                                         |                                            |
| NA19082 (M)                                      | A/A                                              |                                                                        | 40:02:01/40:56/40:97                                                   | 51:01:01/51:01:05/51:01:07/51:11N/51:30/51:32/51:48/51:51              |                                            |
| NA19083 (M)                                      | A/A                                              |                                                                        | 15:01:01:01/15:01:01:02N/15:01:06:15:01:07:15:102/15:104/15:140/15:146 | 44:03:01/44:03:03/44:03:04                                             |                                            |
| NA19084 (F)                                      | A/A                                              |                                                                        | 40:01:01/40:01:02/40:55                                                | 40:01:01/40:01:02/40:55                                                |                                            |
| NA19085 (M)                                      | A/A                                              |                                                                        | 44:03:01/44:03:03/44:03:04                                             | 52:01:01/52:07                                                         |                                            |
| NA19086 (M)                                      | A/A                                              |                                                                        | 40:06:01:01/40:06:01:02                                                | 51:01:01/51:01:05/51:01:07/51:11N/51:30/51:32/51:48/51:51              |                                            |
| NA19087 (F)                                      | A/A                                              |                                                                        | 35:01:01/35:01:03/35:40N/35:42/35:57/35:94                             | 44:03:01/44:03:03/44:03:04                                             |                                            |
| NA19088 (M)                                      | A/A                                              |                                                                        | 15:07                                                                  | 15:01:01:01/15:01:01:02N/15:01:06:15:01:07:15:102/15:104/15:140/15:146 |                                            |
| HG00403 (M)                                      | A/A                                              |                                                                        | HG                                                                     | 13:01:01                                                               | 35:01:01/35:01:03/35:40N/35:42/35:57/35:94 |
| HG00404 (F)                                      | A/A                                              |                                                                        |                                                                        | 15:12/15:19                                                            | 27:04:01                                   |
| HG00406 (M)                                      | A/T                                              |                                                                        |                                                                        | 07:02:01/07:02:06/07:02:09/07:44/07:49N/07:58/07:59/07:61              | 15:02                                      |
| HG00407 (F)                                      | A/A                                              |                                                                        |                                                                        | 40:01:01/40:01:02/40:55                                                | 40:02:01/40:56/40:97                       |
| HG00419 (F)                                      | A/A                                              |                                                                        |                                                                        | 13:01:01                                                               | 40:01:01/40:01:02/40:55                    |
| HG00421 (M)                                      | A/A                                              |                                                                        |                                                                        | 13:02:01/13:02:05                                                      | 46:01:01/46:15N                            |
| HG00422 (F)                                      | A/A                                              |                                                                        |                                                                        | 13:01:01                                                               | 44:03:01/44:03:03/44:03:04                 |
| HG00428 (F)                                      | A/A                                              | 13:02:01/13:02:05                                                      |                                                                        | 46:01:01/46:15N                                                        |                                            |
| HG00436 (M)                                      | A/A                                              | 48:01:01/48:09                                                         |                                                                        | 54:01/54:17                                                            |                                            |
| HG00437 (F)                                      | A/A                                              | 40:01:01/40:01:02/40:55                                                |                                                                        | 51:01:01/51:01:05/51:01:07/51:11N/51:30/51:32/51:48/51:51              |                                            |
| HG00442 (M)                                      | A/A                                              | 40:01:01/40:01:02/40:55                                                |                                                                        | 40:02:01/40:56/40:97                                                   |                                            |
| HG00443 (F)                                      | A/A                                              | 13:01:01                                                               |                                                                        | 54:01/54:17                                                            |                                            |
| HG00445 (M)                                      | A/A                                              | 07:02:01/07:02:06/07:02:09/07:44/07:49N/07:58/07:59/07:61              |                                                                        | 67:01:01                                                               |                                            |
| HG00446 (F)                                      | A/A                                              | 13:01:01                                                               |                                                                        | 40:01:01/40:01:02/40:55                                                |                                            |
| HG00448 (M)                                      | A/A                                              | 46:01:01/46:15N                                                        |                                                                        | 56:01/56:24                                                            |                                            |
| HG00449 (F)                                      | A/A                                              | 39:01:01:01/39:01:01:02L/39:01:03/39:46                                |                                                                        | 46:01:01/46:15N                                                        |                                            |
| HG00451 (M)                                      | A/A                                              | 15:01:01:01/15:01:01:02N/15:01:06:15:01:07:15:102/15:104/15:140/15:146 |                                                                        | 40:01:01/40:01:02/40:55                                                |                                            |
| HG00452 (F)                                      | A/A                                              | 40:01:01/40:01:02/40:55                                                |                                                                        | 55:02:01                                                               |                                            |
| HG00457 (M)                                      | A/A                                              | 39:01:01:01/39:01:01:02L/39:01:03/39:46                                |                                                                        | 46:01:01/46:15N                                                        |                                            |
| HG00458 (F)                                      | A/A                                              | 15:01:01:01/15:01:01:02N/15:01:06:15:01:07:15:102/15:104/15:140/15:146 |                                                                        | 46:01:01/46:15N                                                        |                                            |
| HG00463 (M)                                      | A/T                                              | 15:02                                                                  |                                                                        | 46:01:01/46:15N                                                        |                                            |
| HG00464 (F)                                      | A/A                                              | 15:01:01:01/15:01:01:02N/15:01:06:15:01:07:15:102/15:104/15:140/15:146 |                                                                        | 40:01:01/40:01:02/40:55                                                |                                            |
| HG00472 (M)                                      | A/A                                              | 15:01:01:01/15:01:01:02N/15:01:06:15:01:07:15:102/15:104/15:140/15:146 |                                                                        | 57:01:01                                                               |                                            |
| HG00473 (F)                                      | A/A                                              | 46:01:01/46:15N                                                        |                                                                        | 58:01:01/58:11                                                         |                                            |
| HG00475 (M)                                      | A/A                                              | 13:01:01                                                               |                                                                        | 58:01:01/58:11                                                         |                                            |
| HG00476 (F)                                      | A/A                                              | 40:01:01/40:01:02/40:55                                                |                                                                        | 40:01:01/40:01:02/40:55                                                |                                            |
| HG00478 (M)                                      | A/A                                              | 40:01:01/40:01:02/40:55                                                |                                                                        | 40:01:01/40:01:02/40:55                                                |                                            |
| HG00479 (F)                                      | A/A                                              | 46:01:01/46:15N                                                        |                                                                        | 55:02:01                                                               |                                            |
| HG00500 (M)                                      | A/A                                              | 40:01:01/40:01:02/40:55                                                |                                                                        | 46:01:01/46:15N                                                        |                                            |
| HG00513 (F)                                      | A/A                                              | 40:01:01/40:01:02/40:55                                                |                                                                        | 55:02:01                                                               |                                            |
| HG00524 (M)                                      | A/A                                              | 40:06:01:01/40:06:01:02                                                | 46:01:01/46:15N                                                        |                                                                        |                                            |
| HG00525 (F)                                      | A/A                                              | 07:02:01/07:02:06/07:02:09/07:44/07:49N/07:58/07:59/07:61              | 35:01:01/35:01:03/35:40N/35:42/35:57/35:94                             |                                                                        |                                            |
| HG00530 (M)                                      | A/A                                              | 39:01:01:01/39:01:01:02L/39:01:03/39:46                                | 39:01:01:01/39:01:01:02L/39:01:03/39:46                                |                                                                        |                                            |



| Individual (1000 Genomes Project Phase 3 Naming) | rs144012689 Genotype (minus strand;1000 Genomes) | Population                                                             | HLA-B Allele 1 (from NCBI dbMHC portal)                                | HLA-B Allele 2 (from NCBI dbMHC portal)                   |
|--------------------------------------------------|--------------------------------------------------|------------------------------------------------------------------------|------------------------------------------------------------------------|-----------------------------------------------------------|
| HG00531 (F)                                      | A/A                                              | 1000 Genomes - Han from south, China                                   | 35:01:01/35:01:03/35:40N/35:42/35:57/35:94                             | 46:01:01/46:15N                                           |
| HG00533 (M)                                      | A/A                                              |                                                                        | 39:01:01:01/39:01:01:02L/39:01:03/39:46                                | 48:01:01/48:09                                            |
| HG00534 (F)                                      | A/A                                              |                                                                        | 46:01:01/46:15N                                                        | 57:01:01                                                  |
| HG00536 (M)                                      | A/T                                              |                                                                        | 15:02                                                                  | 46:01:01/46:15N                                           |
| HG00537 (F)                                      | A/A                                              |                                                                        | 46:01:01/46:15N                                                        | 46:01:01/46:15N                                           |
| HG00542 (M)                                      | A/A                                              |                                                                        | 46:01:01/46:15N                                                        | 58:01:01/58:11                                            |
| HG00543 (F)                                      | A/A                                              |                                                                        | 35:01:01/35:01:03/35:40N/35:42/35:57/35:94                             | 46:01:01/46:15N                                           |
| HG00556 (M)                                      | A/A                                              |                                                                        | 40:01:01/40:01:02/40:55                                                | 40:01:01/40:01:02/40:55                                   |
| HG00557 (F)                                      | A/A                                              |                                                                        | 37:01:01                                                               | 48:01:01/48:09                                            |
| HG00559 (M)                                      | A/A                                              |                                                                        | 55:02:01                                                               | 58:01:01/58:11                                            |
| HG00560 (F)                                      | A/T                                              |                                                                        | 15:02                                                                  | 39:01:01:01/39:01:01:02L/39:01:03/39:46                   |
| HG00565 (M)                                      | A/A                                              |                                                                        | 40:01:01/40:01:02/40:55                                                | 40:01:01/40:01:02/40:55                                   |
| HG00566 (F)                                      | A/A                                              |                                                                        | 46:01:01/46:15N                                                        | 58:01:01/58:11                                            |
| HG00580 (M)                                      | A/A                                              |                                                                        | 13:02:01/13:02:05                                                      | 51:01:01/51:01:05/51:01:07/51:11N/51:30/51:32/51:48/51:51 |
| HG00581 (F)                                      | A/A                                              |                                                                        | 15:11:01                                                               | 40:01:01/40:01:02/40:55                                   |
| HG00583 (M)                                      | A/A                                              |                                                                        | 40:01:01/40:01:02/40:55                                                | 55:02:01                                                  |
| HG00584 (F)                                      | A/A                                              |                                                                        | 40:01:01/40:01:02/40:55                                                | 40:01:01/40:01:02/40:55                                   |
| HG00589 (M)                                      | A/A                                              |                                                                        | 13:01:01                                                               | 51:01:01/51:01:05/51:01:07/51:11N/51:30/51:32/51:48/51:51 |
| HG00590 (F)                                      | A/A                                              |                                                                        | 15:25:01                                                               | 35:01:01/35:01:03/35:40N/35:42/35:57/35:94                |
| HG00592 (M)                                      | A/A                                              |                                                                        | 08:01:01/08:19N                                                        | 51:01:01/51:01:05/51:01:07/51:11N/51:30/51:32/51:48/51:51 |
| HG00593 (F)                                      | A/A                                              |                                                                        | 27:04:01                                                               | 35:01:01/35:01:03/35:40N/35:42/35:57/35:94                |
| HG00595 (M)                                      | A/T                                              |                                                                        | 15:02                                                                  | 40:01:01/40:01:02/40:55                                   |
| HG00596 (F)                                      | A/A                                              |                                                                        | 15:01:01:01/15:01:01:02N/15:01:06/15:01:07/15:102/15:104/15:140/15:146 | 40:01:01/40:01:02/40:55                                   |
| HG00607 (M)                                      | A/A                                              |                                                                        | 40:01:01/40:01:02/40:55                                                | 58:01:01/58:11                                            |
| HG00608 (F)                                      | A/A                                              |                                                                        | 40:01:01/40:01:02/40:55                                                | 40:02:01/40:56/40:97                                      |
| HG00610 (M)                                      | A/A                                              |                                                                        | 40:06:01:01/40:06:01:02                                                | 51:01:01/51:01:05/51:01:07/51:11N/51:30/51:32/51:48/51:51 |
| HG00611 (F)                                      | A/A                                              |                                                                        | 46:01:01/46:15N                                                        | 46:01:01/46:15N                                           |
| HG00613 (M)                                      | A/A                                              |                                                                        | 40:01:01/40:01:02/40:55                                                | 46:01:01/46:15N                                           |
| HG00614 (F)                                      | A/A                                              |                                                                        | 13:01:01                                                               | 55:02:01                                                  |
| HG00619 (M)                                      | A/A                                              |                                                                        | 40:01:01/40:01:02/40:55                                                | 56:01/56:24                                               |
| HG00620 (F)                                      | T/A                                              |                                                                        | 15:02                                                                  | 51:01:01/51:01:05/51:01:07/51:11N/51:30/51:32/51:48/51:51 |
| HG00625 (M)                                      | A/A                                              |                                                                        | 15:01:01:01/15:01:01:02N/15:01:06/15:01:07/15:102/15:104/15:140/15:146 | 35:01:01/35:01:03/35:40N/35:42/35:57/35:94                |
| HG00626 (F)                                      | A/A                                              |                                                                        | 15:27:01                                                               | 40:01:01/40:01:02/40:55                                   |
| HG00628 (M)                                      | A/A                                              |                                                                        | 13:01:01                                                               | 38:02:01/38:18                                            |
| HG00629 (F)                                      | A/A                                              |                                                                        | 35:01:01/35:01:03/35:40N/35:42/35:57/35:94                             | 40:02:01/40:56/40:97                                      |
| HG00634 (M)                                      | A/A                                              |                                                                        | 39:01:01:01/39:01:01:02L/39:01:03/39:46                                | 39:01:01:01/39:01:01:02L/39:01:03/39:46                   |
| HG00650 (M)                                      | A/A                                              |                                                                        | 46:01:01/46:15N                                                        | 58:01:01/58:11                                            |
| HG00651 (F)                                      | A/A                                              |                                                                        | 13:01:01                                                               | 46:01:01/46:15N                                           |
| HG00653 (M)                                      | A/A                                              |                                                                        | 51:01:01/51:01:05/51:01:07/51:11N/51:30/51:32/51:48/51:51              | 58:01:01/58:11                                            |
| HG00654 (F)                                      | A/A                                              |                                                                        | 40:01:01/40:01:02/40:55                                                | 40:01:01/40:01:02/40:55                                   |
| HG00656 (M)                                      | A/A                                              | 39:01:01:01/39:01:01:02L/39:01:03/39:46                                | 46:01:01/46:15N                                                        |                                                           |
| HG00657 (F)                                      | A/A                                              | 46:01:01/46:15N                                                        | 51:01:02                                                               |                                                           |
| HG00662 (M)                                      | A/A                                              | 40:01:01/40:01:02/40:55                                                | 46:01:01/46:15N                                                        |                                                           |
| HG00663 (F)                                      | A/A                                              | 40:01:01/40:01:02/40:55                                                | 51:01:02                                                               |                                                           |
| HG00671 (M)                                      | T/A                                              | 15:02                                                                  | 48:03:01                                                               |                                                           |
| HG00672 (F)                                      | A/A                                              | 38:02:01/38:18                                                         | 51:02:01                                                               |                                                           |
| HG00683 (M)                                      | A/A                                              | 40:01:01/40:01:02/40:55                                                | 46:01:01/46:15N                                                        |                                                           |
| HG00684 (F)                                      | A/A                                              | 13:01:01                                                               | 13:01:01                                                               |                                                           |
| HG00689 (M)                                      | A/A                                              | 40:01:01/40:01:02/40:55                                                | 48:01:01/48:09                                                         |                                                           |
| HG00690 (F)                                      | A/A                                              | 39:01:01:01/39:01:01:02L/39:01:03/39:46                                | 40:01:01/40:01:02/40:55                                                |                                                           |
| HG00692 (M)                                      | A/A                                              | 15:01:01:01/15:01:01:02N/15:01:06/15:01:07/15:102/15:104/15:140/15:146 | 46:01:01/46:15N                                                        |                                                           |
| HG00693 (F)                                      | A/A                                              | 13:01:01                                                               | 40:01:01/40:01:02/40:55                                                |                                                           |
| HG00698 (M)                                      | A/A                                              | 38:02:01/38:18                                                         | 58:01:01/58:11                                                         |                                                           |
| HG00699 (F)                                      | A/A                                              | 52:01:01/52:07                                                         | 58:01:01/58:11                                                         |                                                           |
| HG00701 (M)                                      | T/A                                              | 15:02                                                                  | 46:01:01/46:15N                                                        |                                                           |
| HG00704 (M)                                      | A/A                                              | 13:01:01                                                               | 38:02:01/38:18                                                         |                                                           |

| Individual (1000 Genomes Project Phase 3 Naming) | rs144012689 Genotype (minus strand;1000 Genomes) | Population | <i>HLA-B</i> Allele 1 (from NCBI dbMHC portal) | <i>HLA-B</i> Allele 2 (from NCBI dbMHC portal) |
|--------------------------------------------------|--------------------------------------------------|------------|------------------------------------------------|------------------------------------------------|
| HG00705 (F)                                      | A A                                              |            | 27:04:01                                       | 54:01/54:17                                    |
| HG00707 (M)                                      | A A                                              |            | 40:01:01/40:01:02/40:55                        | 46:01:01/46:15N                                |
| HG00708 (F)                                      | A A                                              |            | 46:01:01/46:15N                                | 57:01:01                                       |
