# Supplementary material for: A Screening Test for HLA-B∗15:02 in a Large United States Patient Cohort Identifies Broader Risk of Carbamazepine-Induced Adverse Events
Source: PubMed Central journal article supplement (PMC6443844; doi:10.3389/fphar.2019.00149), 2019-03-26
Supplement: Table_2.pdf [file Table_2.pdf]

**Supplementary Table S2. HLA-B and rs144012689 genotypes of 32 HLA-B\*15:02 positive control samples**

| Sample ID | HLA-B Allele 1 | HLA-B Allele 2                                            | rs14401289 PCR genotype |
|-----------|----------------|-----------------------------------------------------------|-------------------------|
| NA17019   | 15:02          | 15:11                                                     | T/A                     |
| NA23093   | 15:02          | 15:02                                                     | T/T                     |
| NA23090   | 15:02          | 51:01                                                     | T/A                     |
| NA18547   | 15:02          | 38:01                                                     | T/A                     |
| HG00406   | 15:02          | 07:02:01/07:02:06/07:02:09/07:44/07:49N/07:58/07:59/07:61 | T/A                     |
| HG00536   | 15:02          | 46:01:01/46:15N                                           | T/A                     |
| HG00560   | 15:02          | 39:01:01:01/39:01:01:02L/39:01:03/39:46                   | T/A                     |
| HG00595   | 15:02          | 40:01:01/40:01:02/40:55                                   | T/A                     |
| HG00620   | 15:02          | 51:01:01/51:01:05/51:01:07/51:11N/51:30/51:32/51:48/51:51 | T/A                     |
| HG00671   | 15:02          | 48:03:01                                                  | T/A                     |
| HG00701   | 15:02          | 46:01:01/46:15N                                           | T/A                     |
| NA18559   | 15:02          | 37:01:01                                                  | T/A                     |
| NA18639   | 15:02          | 54:01/54:17                                               | T/A                     |
| NA18630   | 15:02          | 40:01:01/40:01:02/40:55                                   | T/A                     |
| NA18152   | 15:02          | 40:01:01/40:01:02/40:55                                   | T/A                     |
| NA18674   | 15:02          | 40:01:01/40:01:02/40:55                                   | T/A                     |
| NA17999   | 15:02          | 40:01:01/40:01:02/40:55                                   | T/A                     |
| NA18127   | 15:02          | 27:04:01                                                  | T/A                     |
| NA17988   | 15:02          | 40:01:01/40:01:02/40:55                                   | T/A                     |
| NA17997   | 15:02          | 38:02:01/38:18                                            | T/A                     |
| NA18118   | 15:02          | 13:01:01                                                  | T/A                     |
| NA18122   | 15:02          | 15:02                                                     | T/T                     |
| NA17982   | 15:02          | 35:05                                                     | T/A                     |
| NA17977   | 15:02          | 55:02:01                                                  | T/A                     |
| NA17969   | 15:02          | 37:01:01                                                  | T/A                     |
| IHW09182  | 15:02          | 18:01                                                     | T/A                     |
| IHW09185  | 15:02          | 46:01                                                     | T/A                     |
| IHW09186  | 15:02          | 46:01                                                     | T/A                     |
| IHW09189  | 15:02          | 46:01                                                     | T/A                     |
| IHW09199  | 15:02          | 15:13                                                     | T/T                     |
| IHW09237  | 15:02          | 55:02BCTX                                                 | T/A                     |
| IHW09432  | 15:02          | 38:02UF                                                   | T/A                     |
